# Supplementary material for: Low impact synthesis of β-nitroacrylates under fully heterogeneous conditions
Source: Royal Society of Chemistry journal article supplement (doi:10.1039/c3gc40936h), 2013-01-01

$^1\text{H}$  NMR **3a**

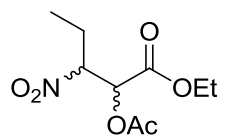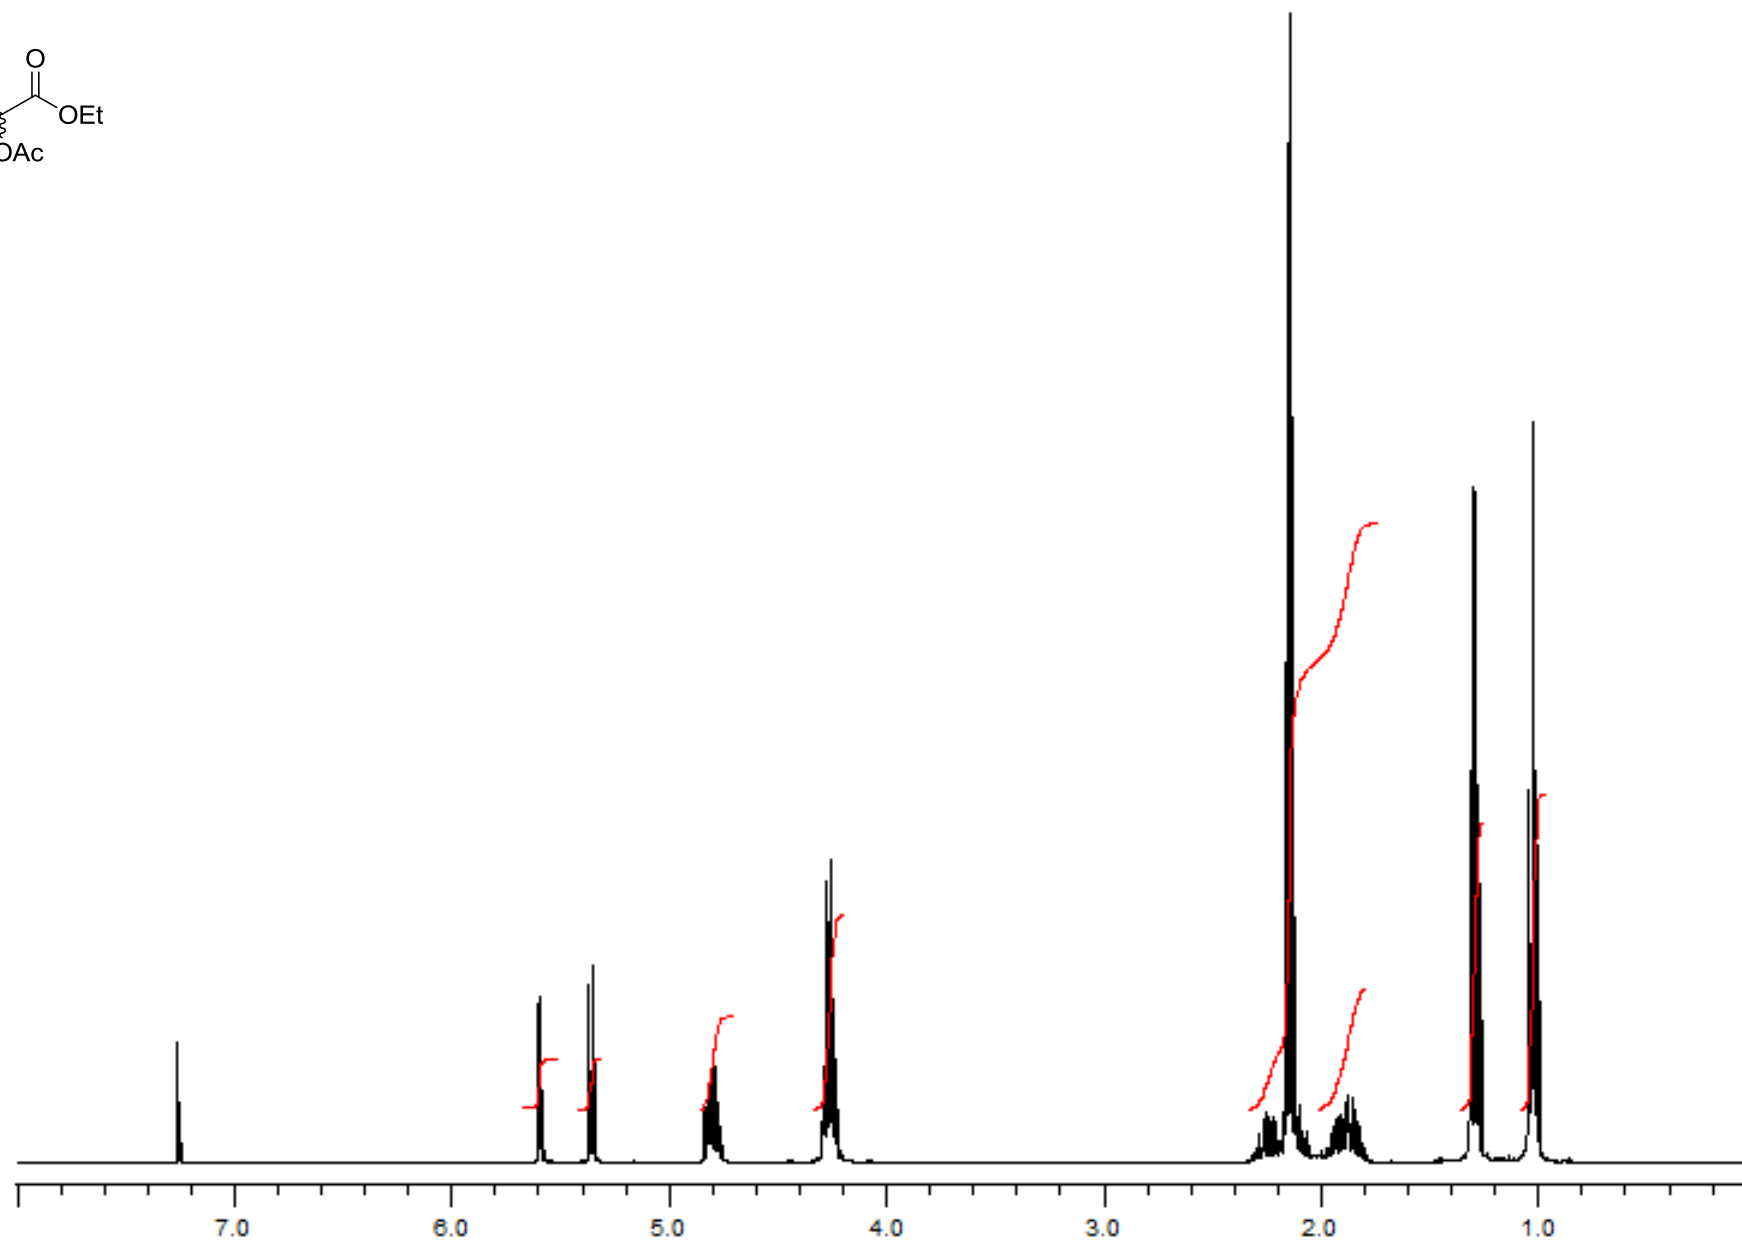

$^{13}\text{C}$  NMR **3a**

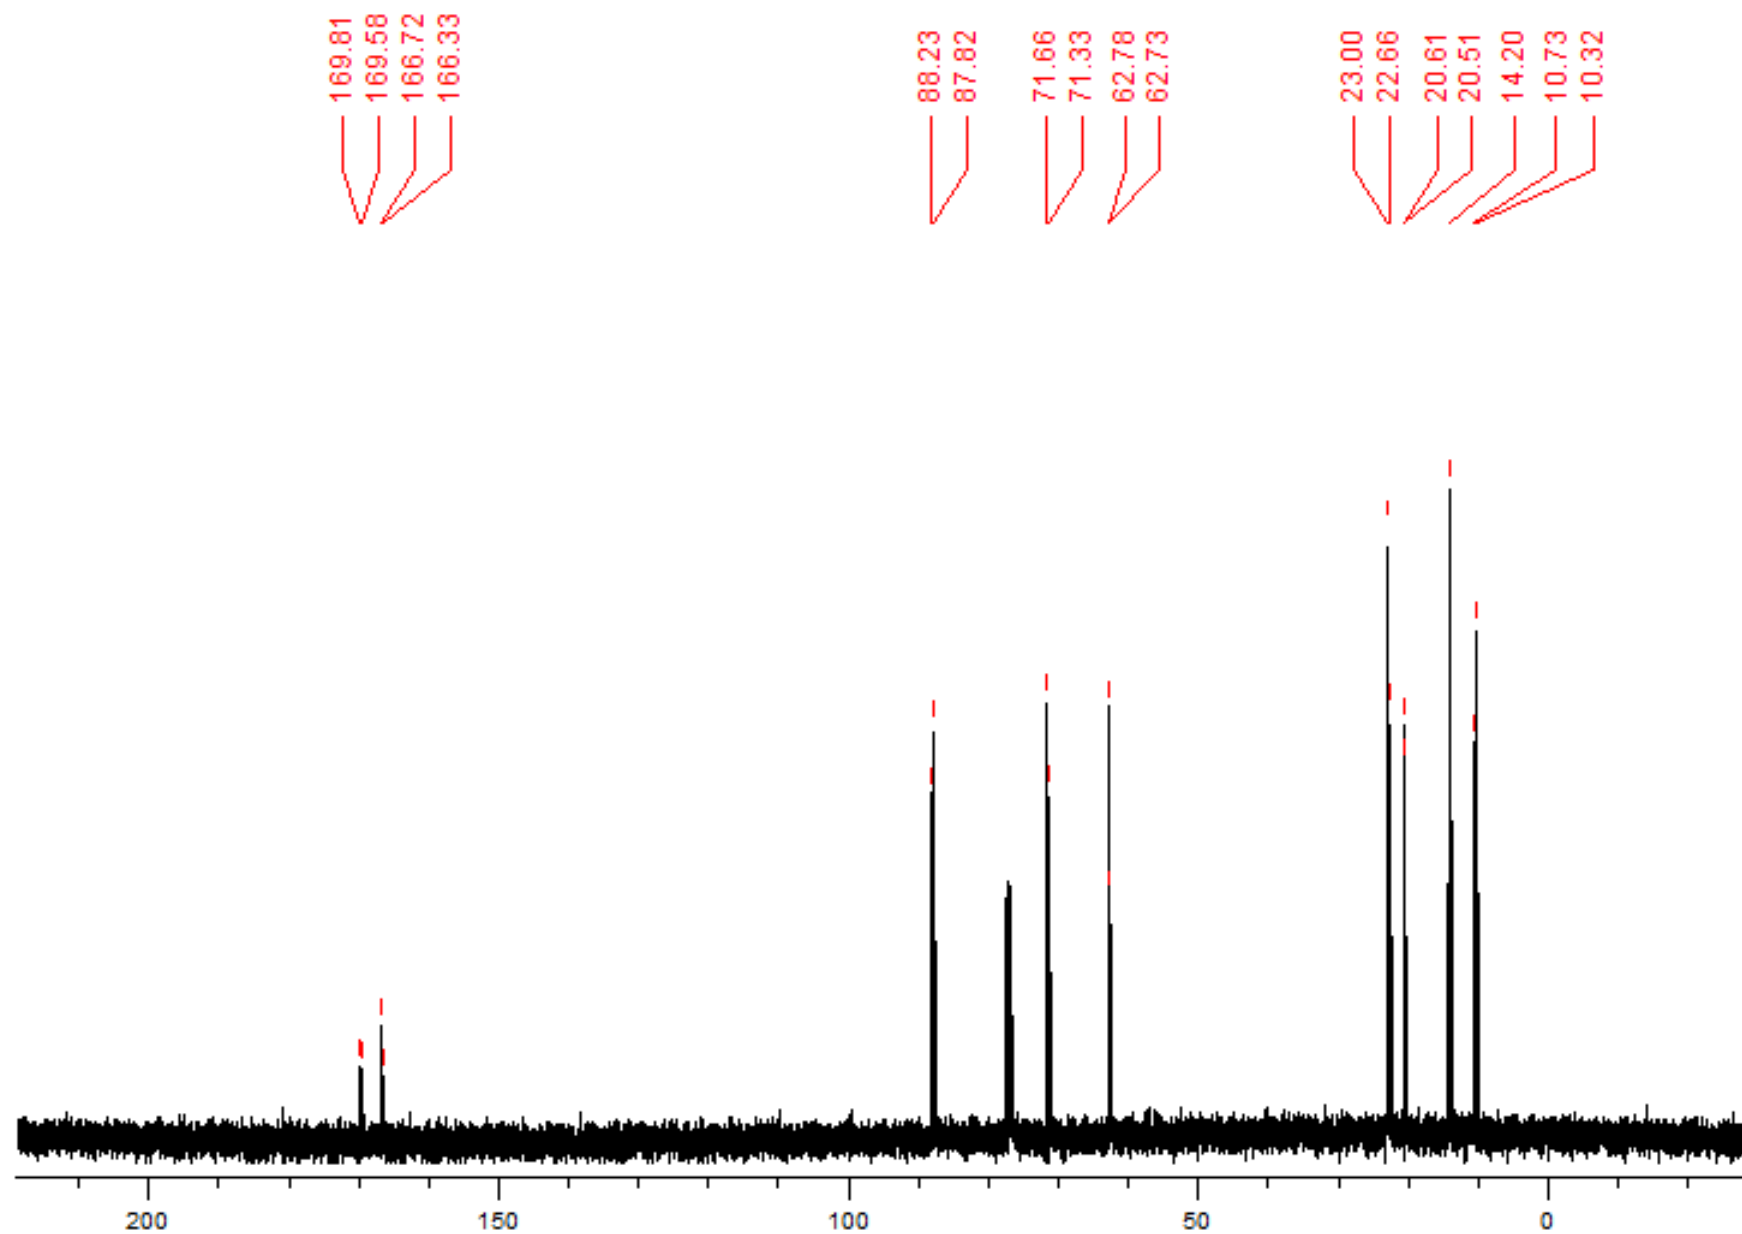

$^1\text{H}$  NMR **4a**

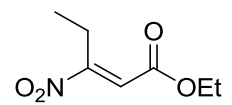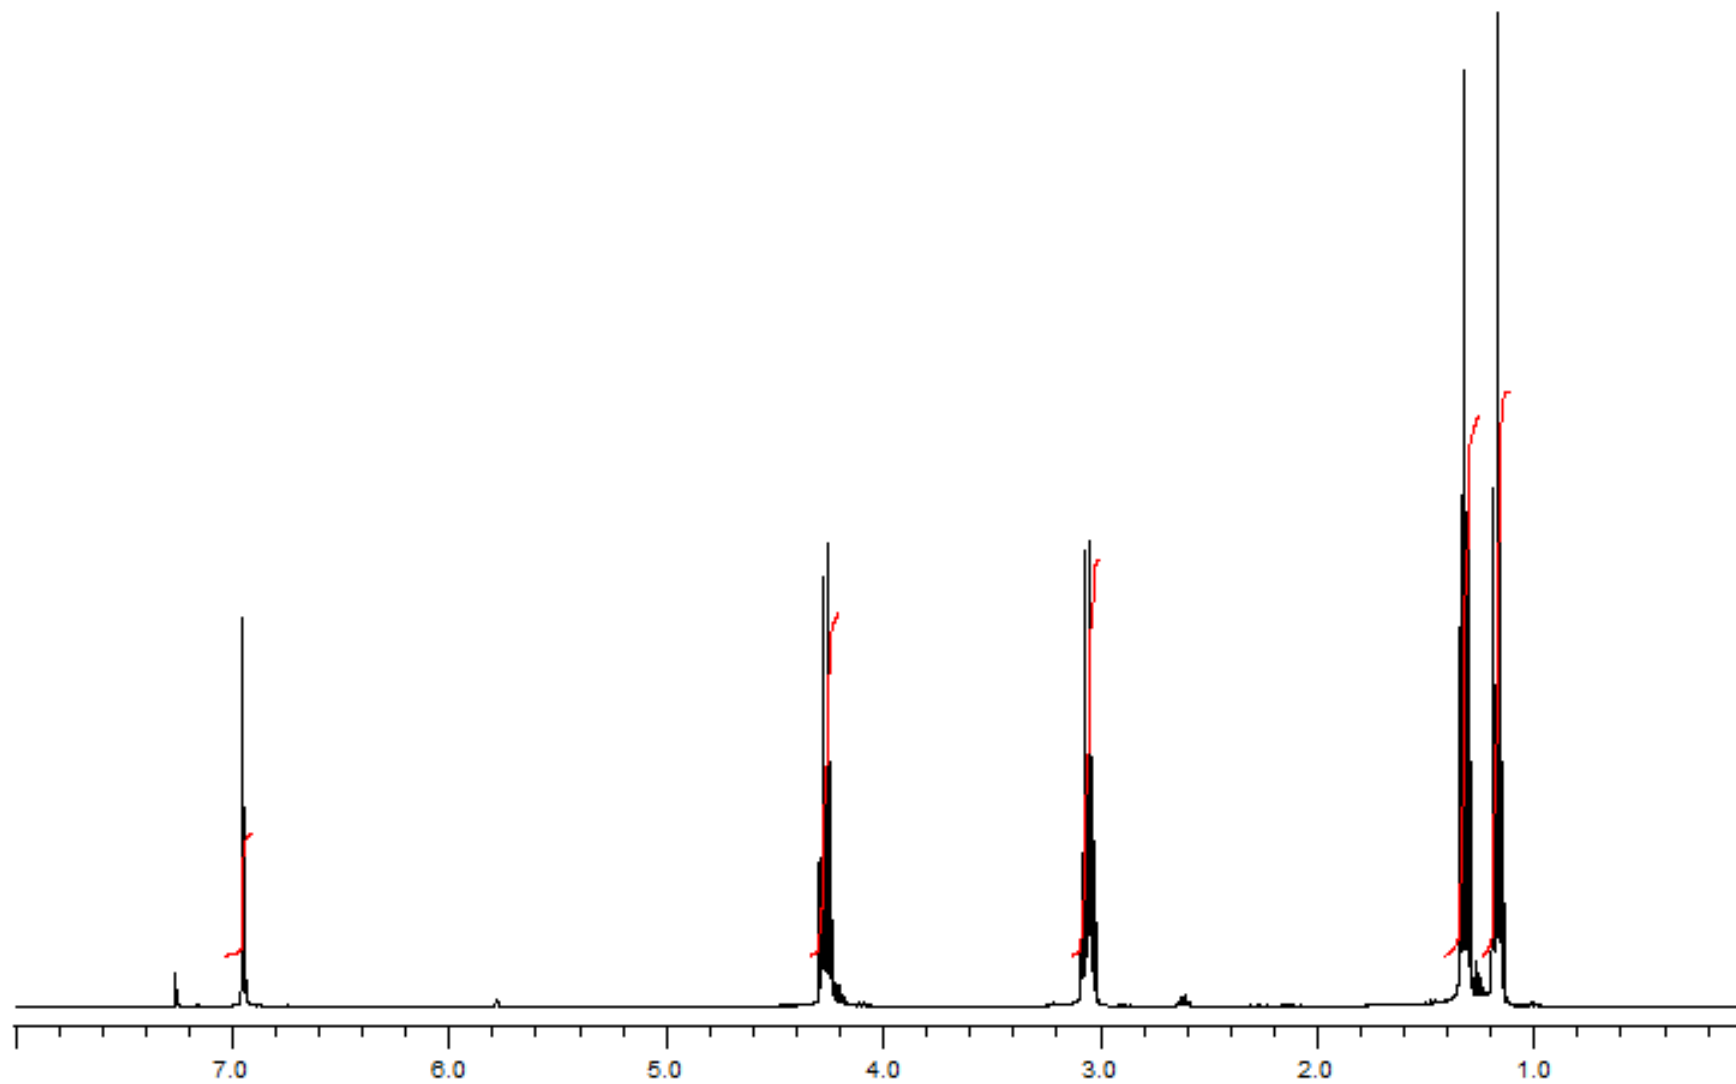

$^{13}\text{C}$  NMR **4a**

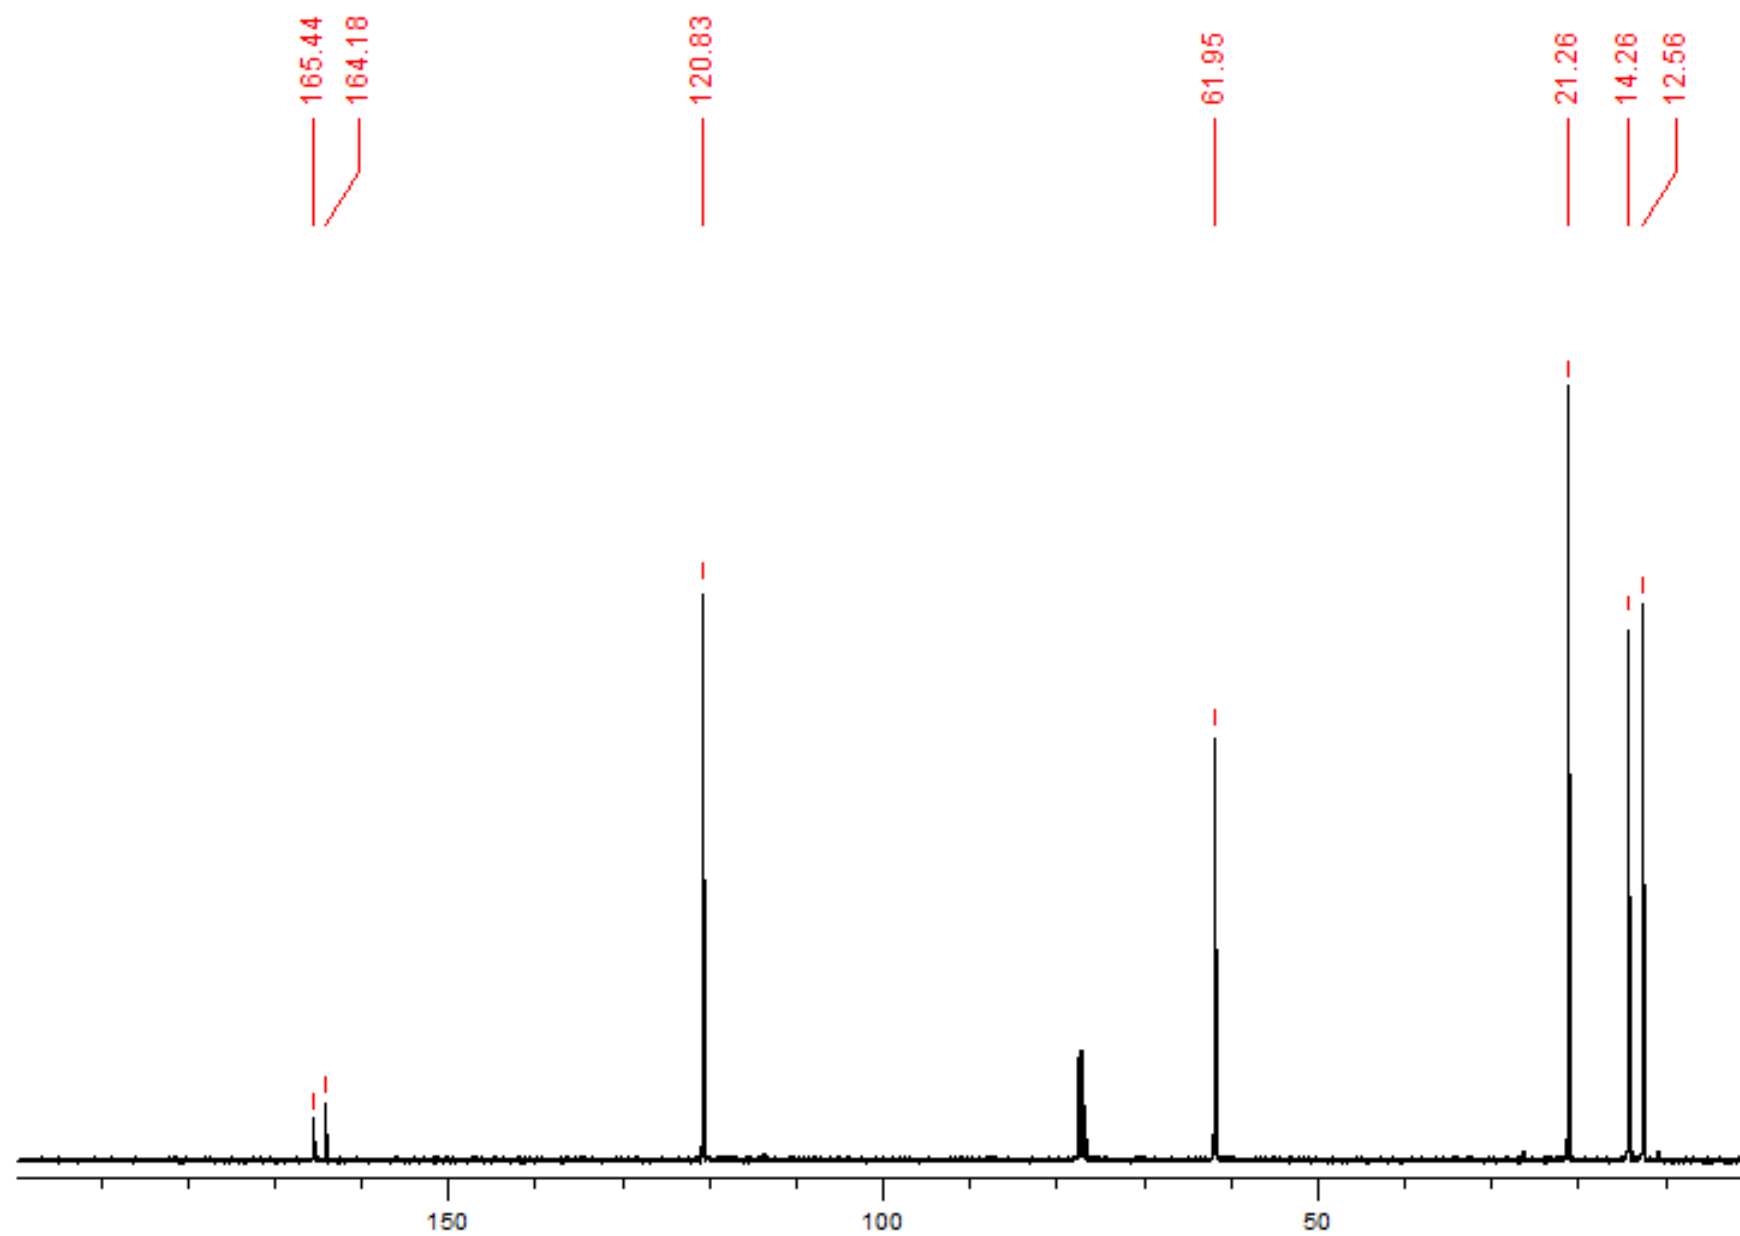

$^1\text{H}$  NMR **4b**

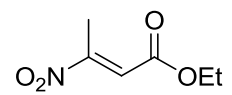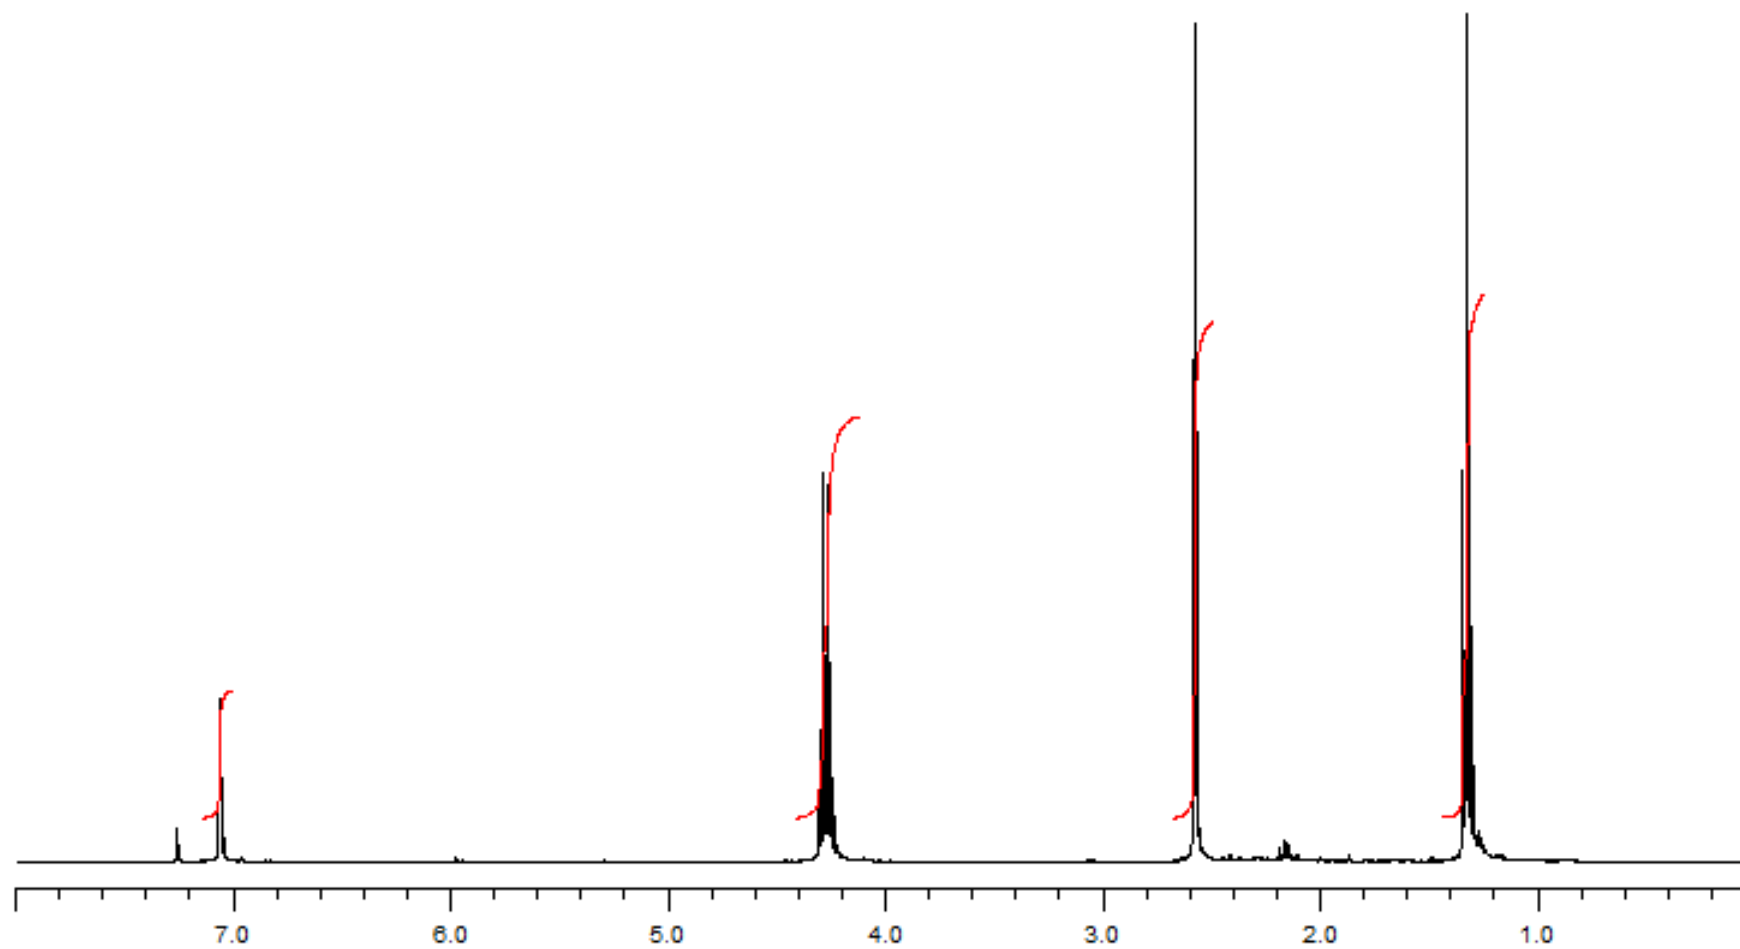

$^{13}\text{C}$  NMR **4b**

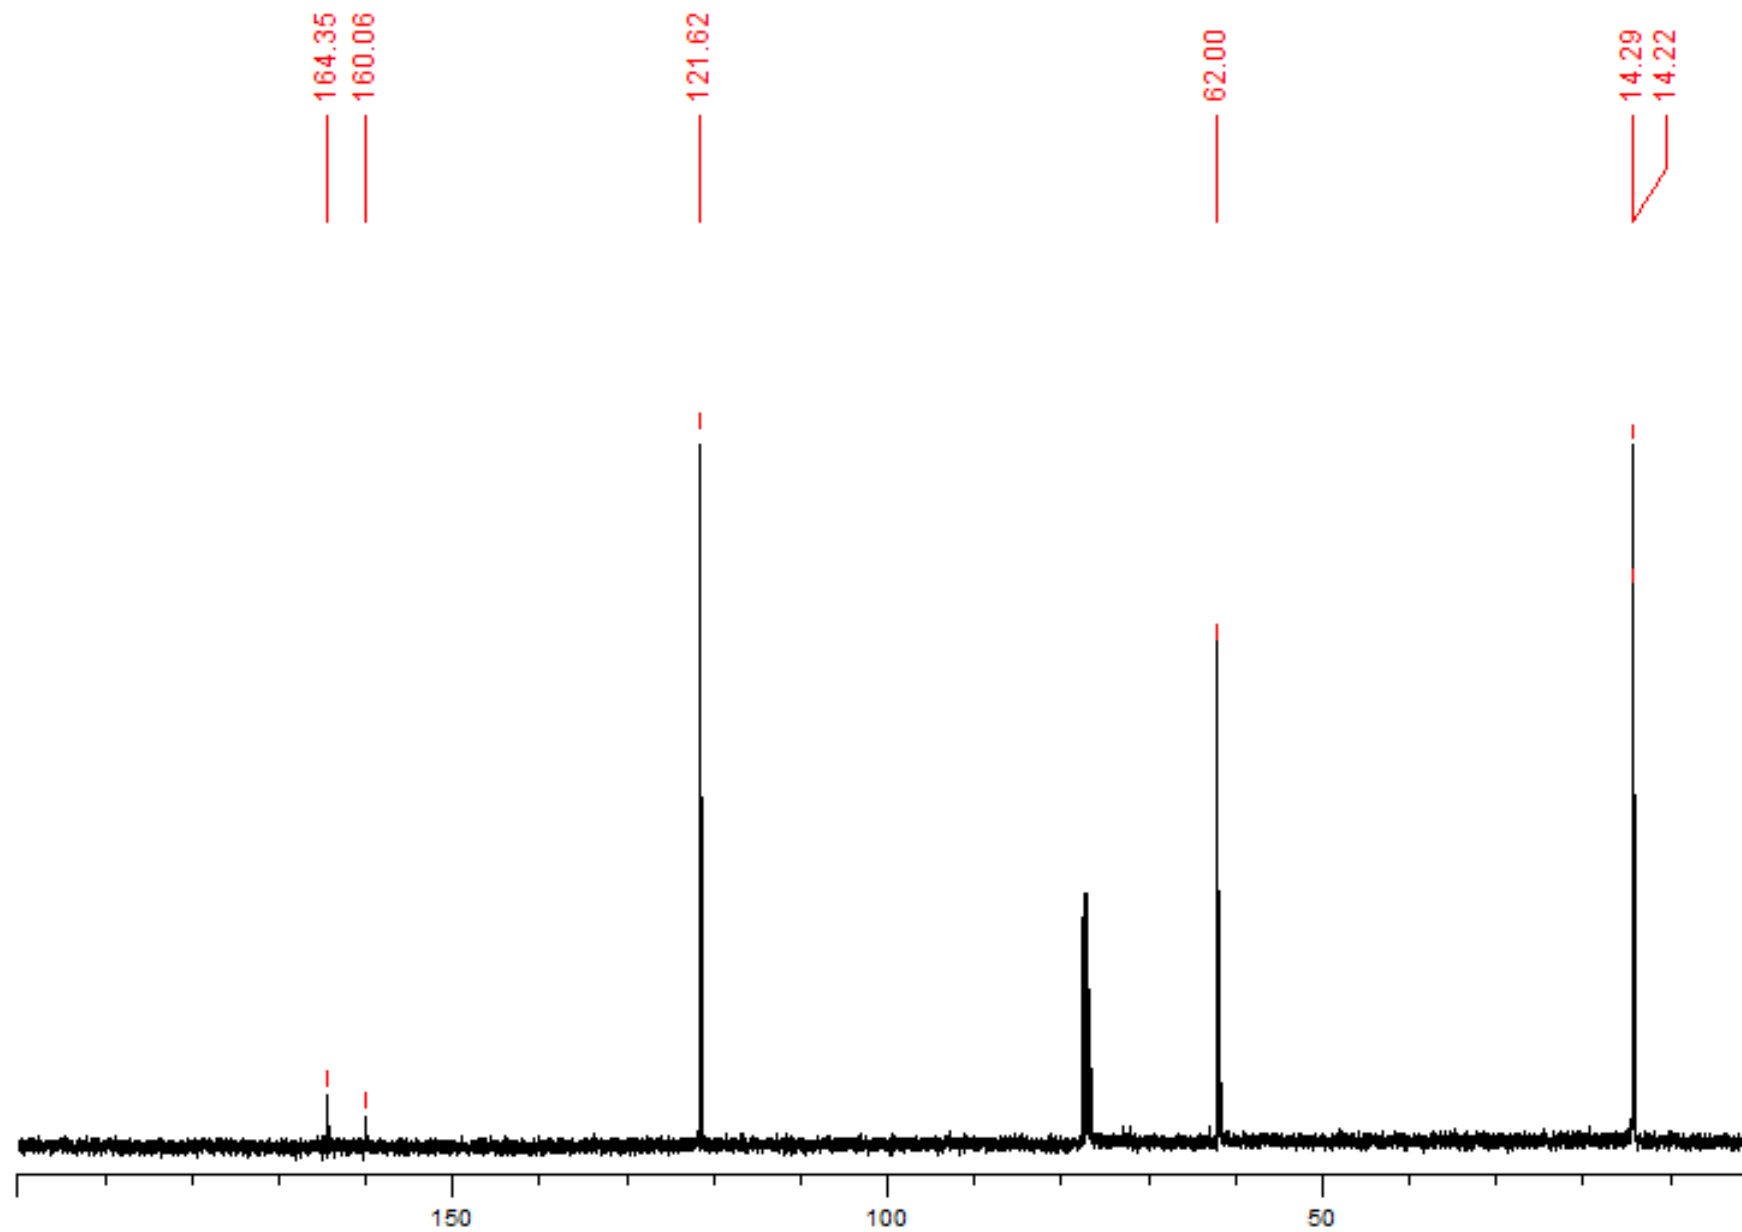

$^1\text{H}$  NMR **4c**

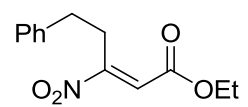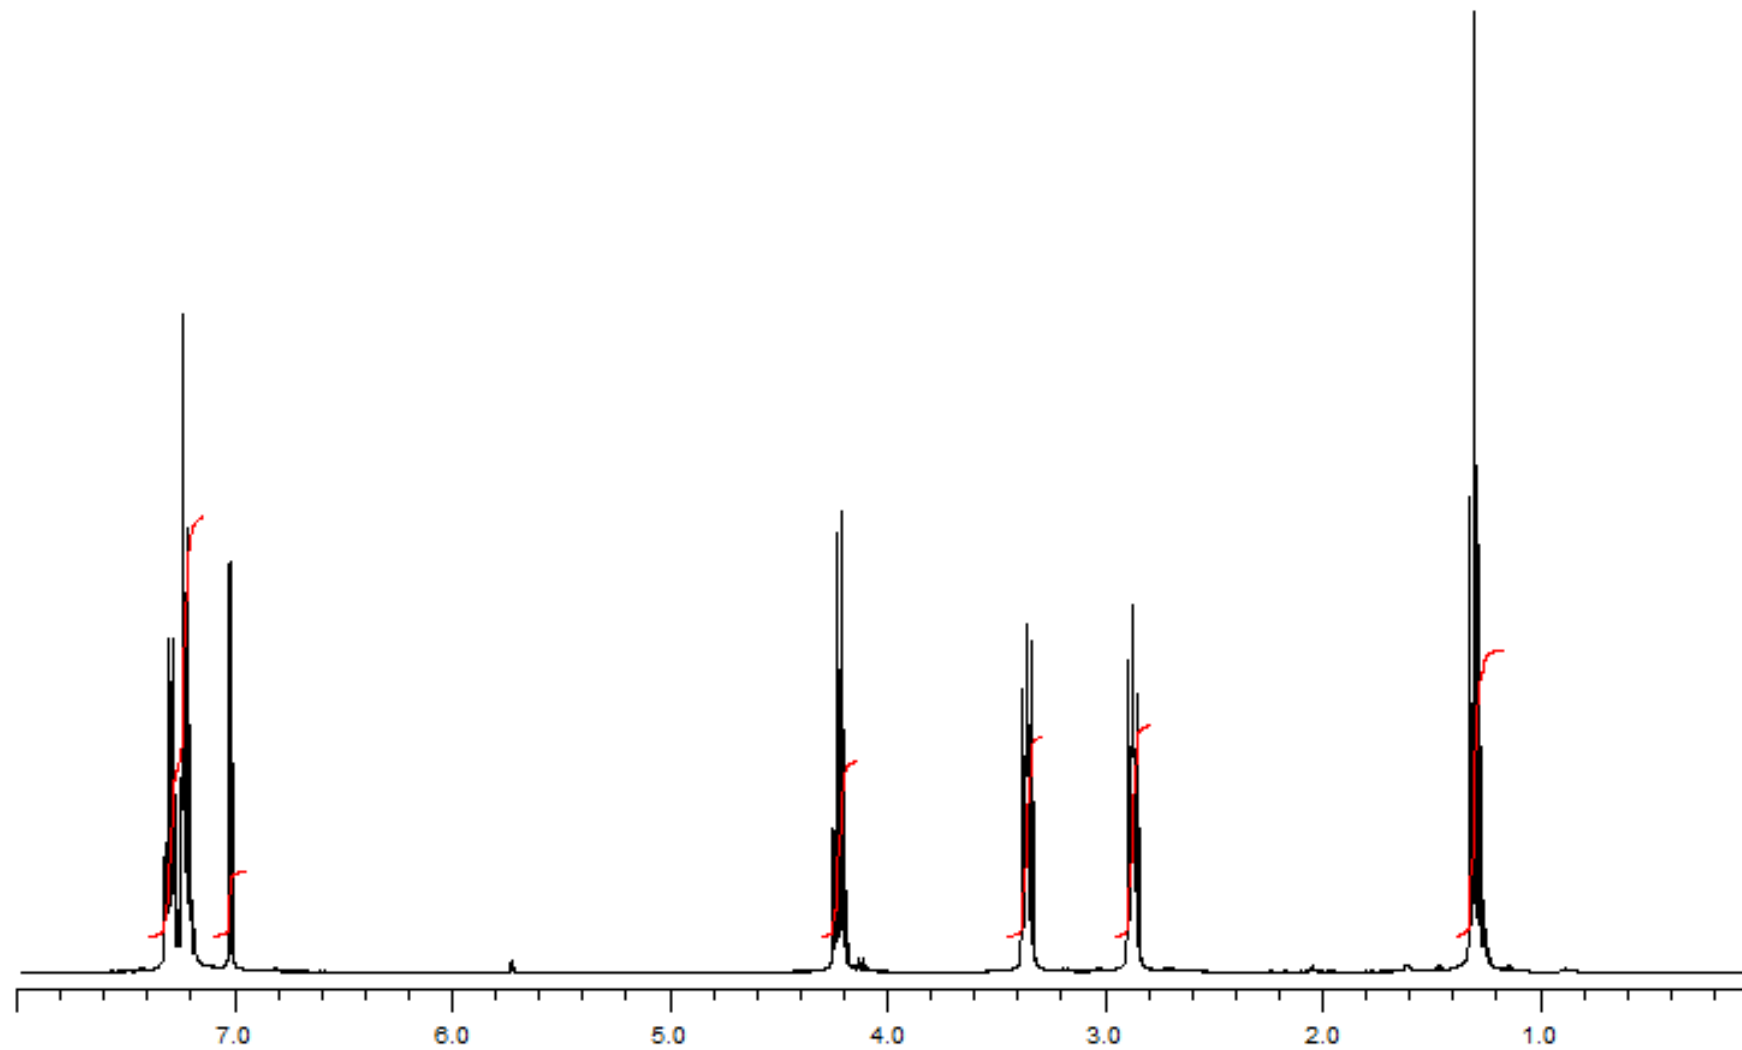

$^{13}\text{C}$  NMR **4c**

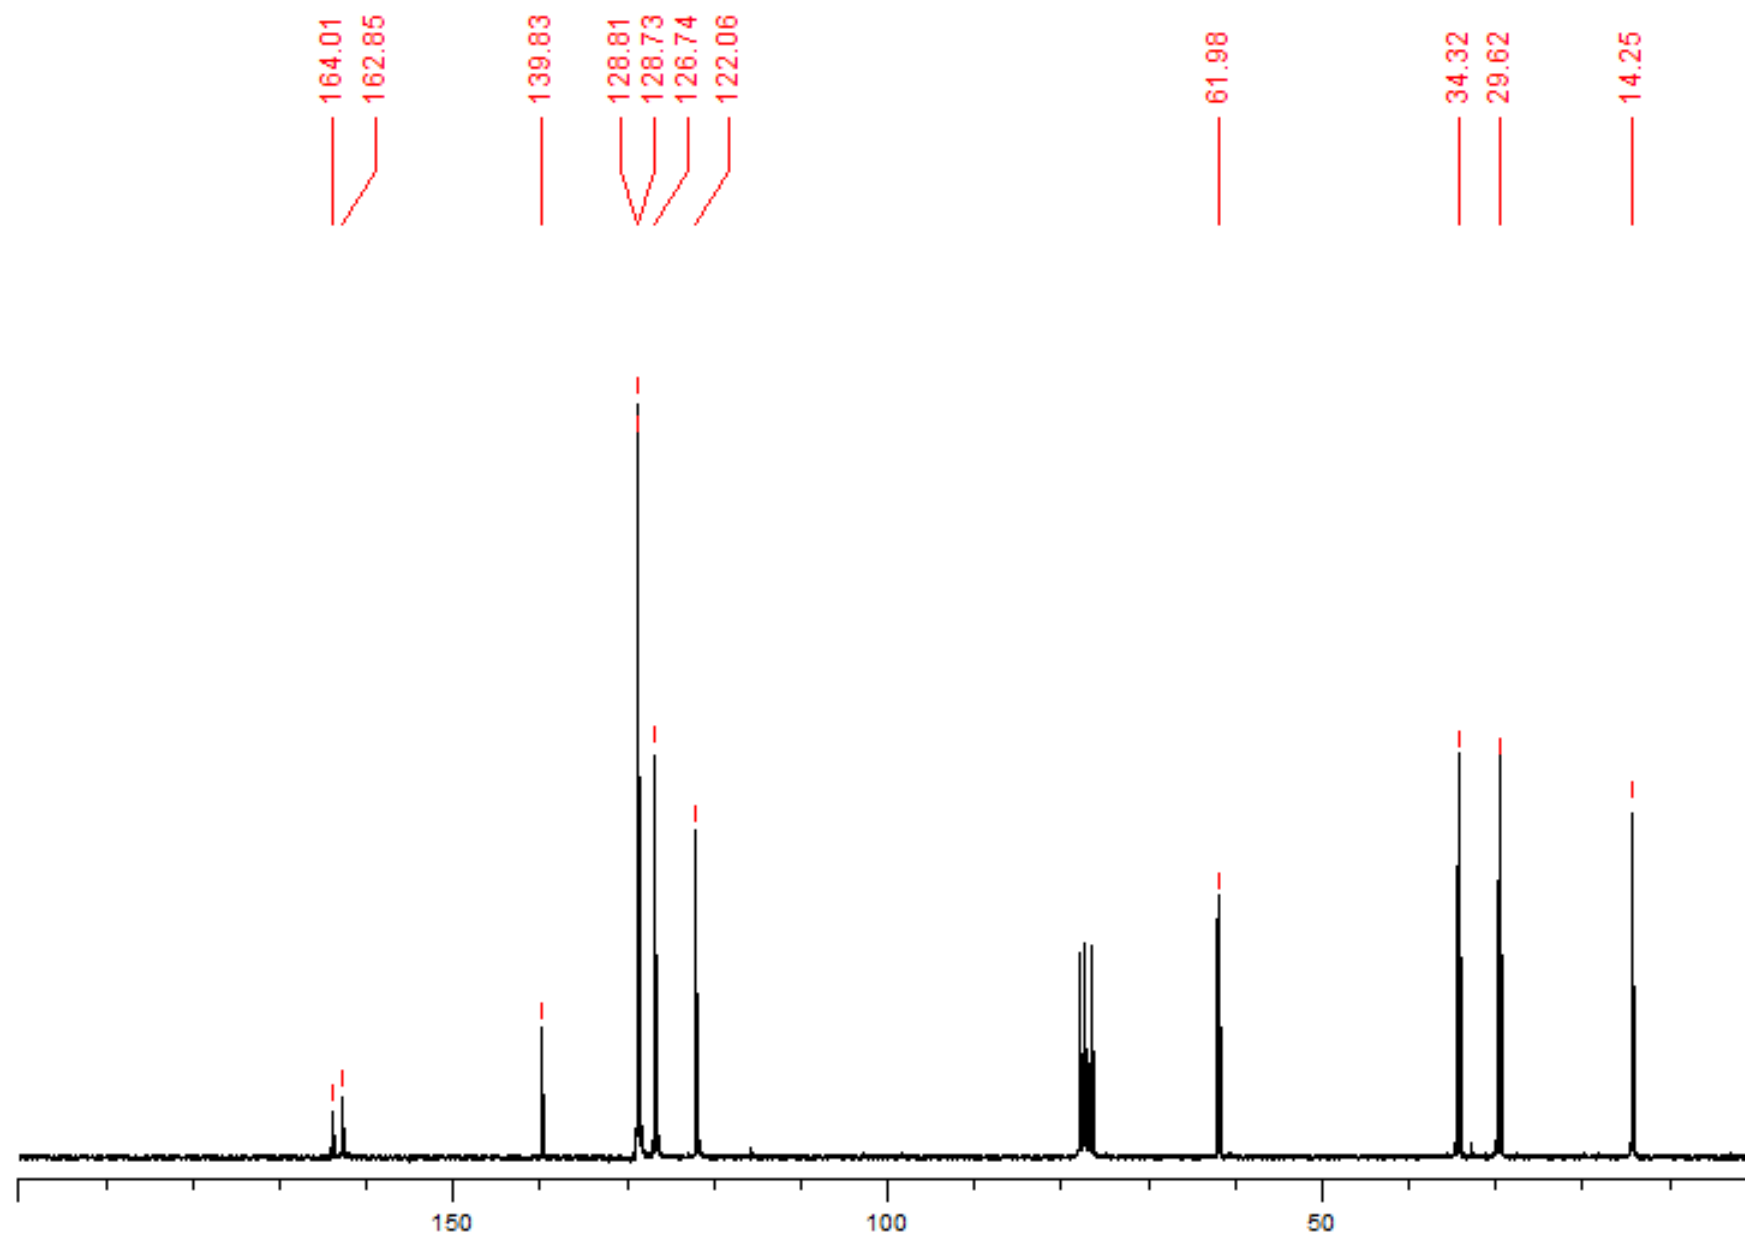



$^1\text{H}$  NMR **4d**

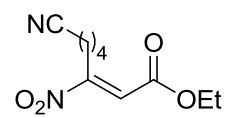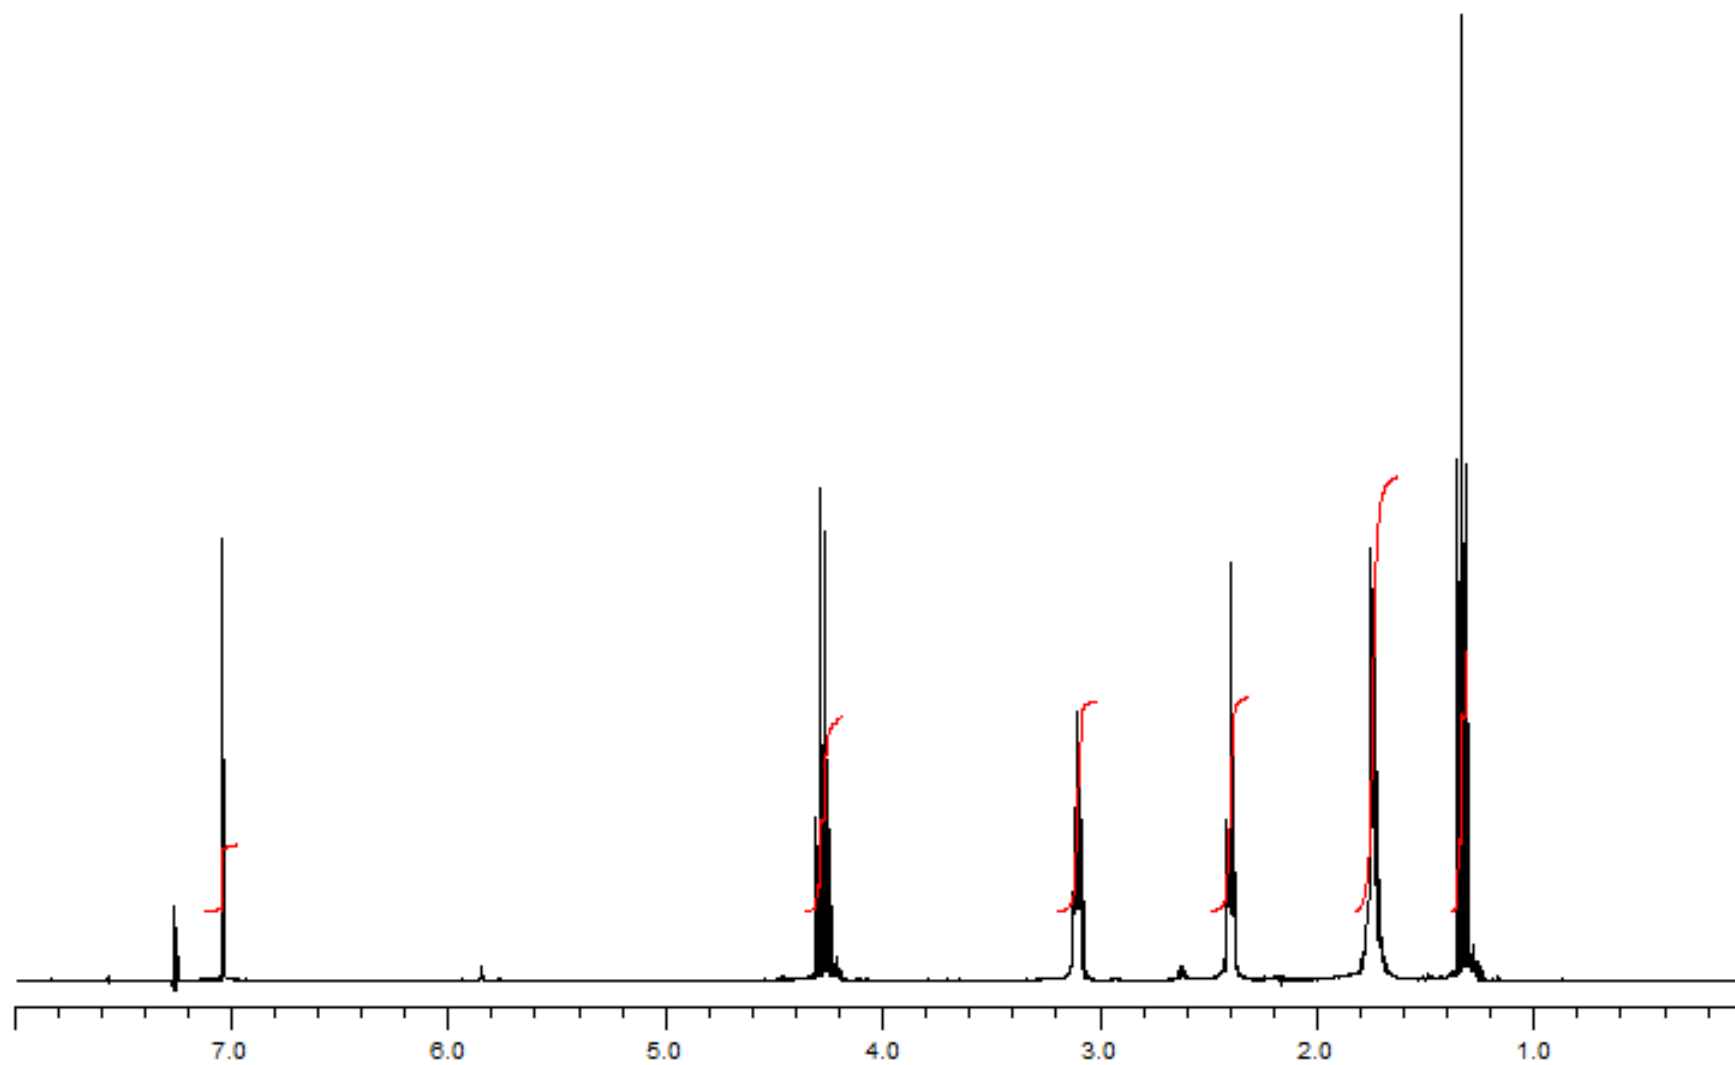

$^{13}\text{C}$  NMR **4d**

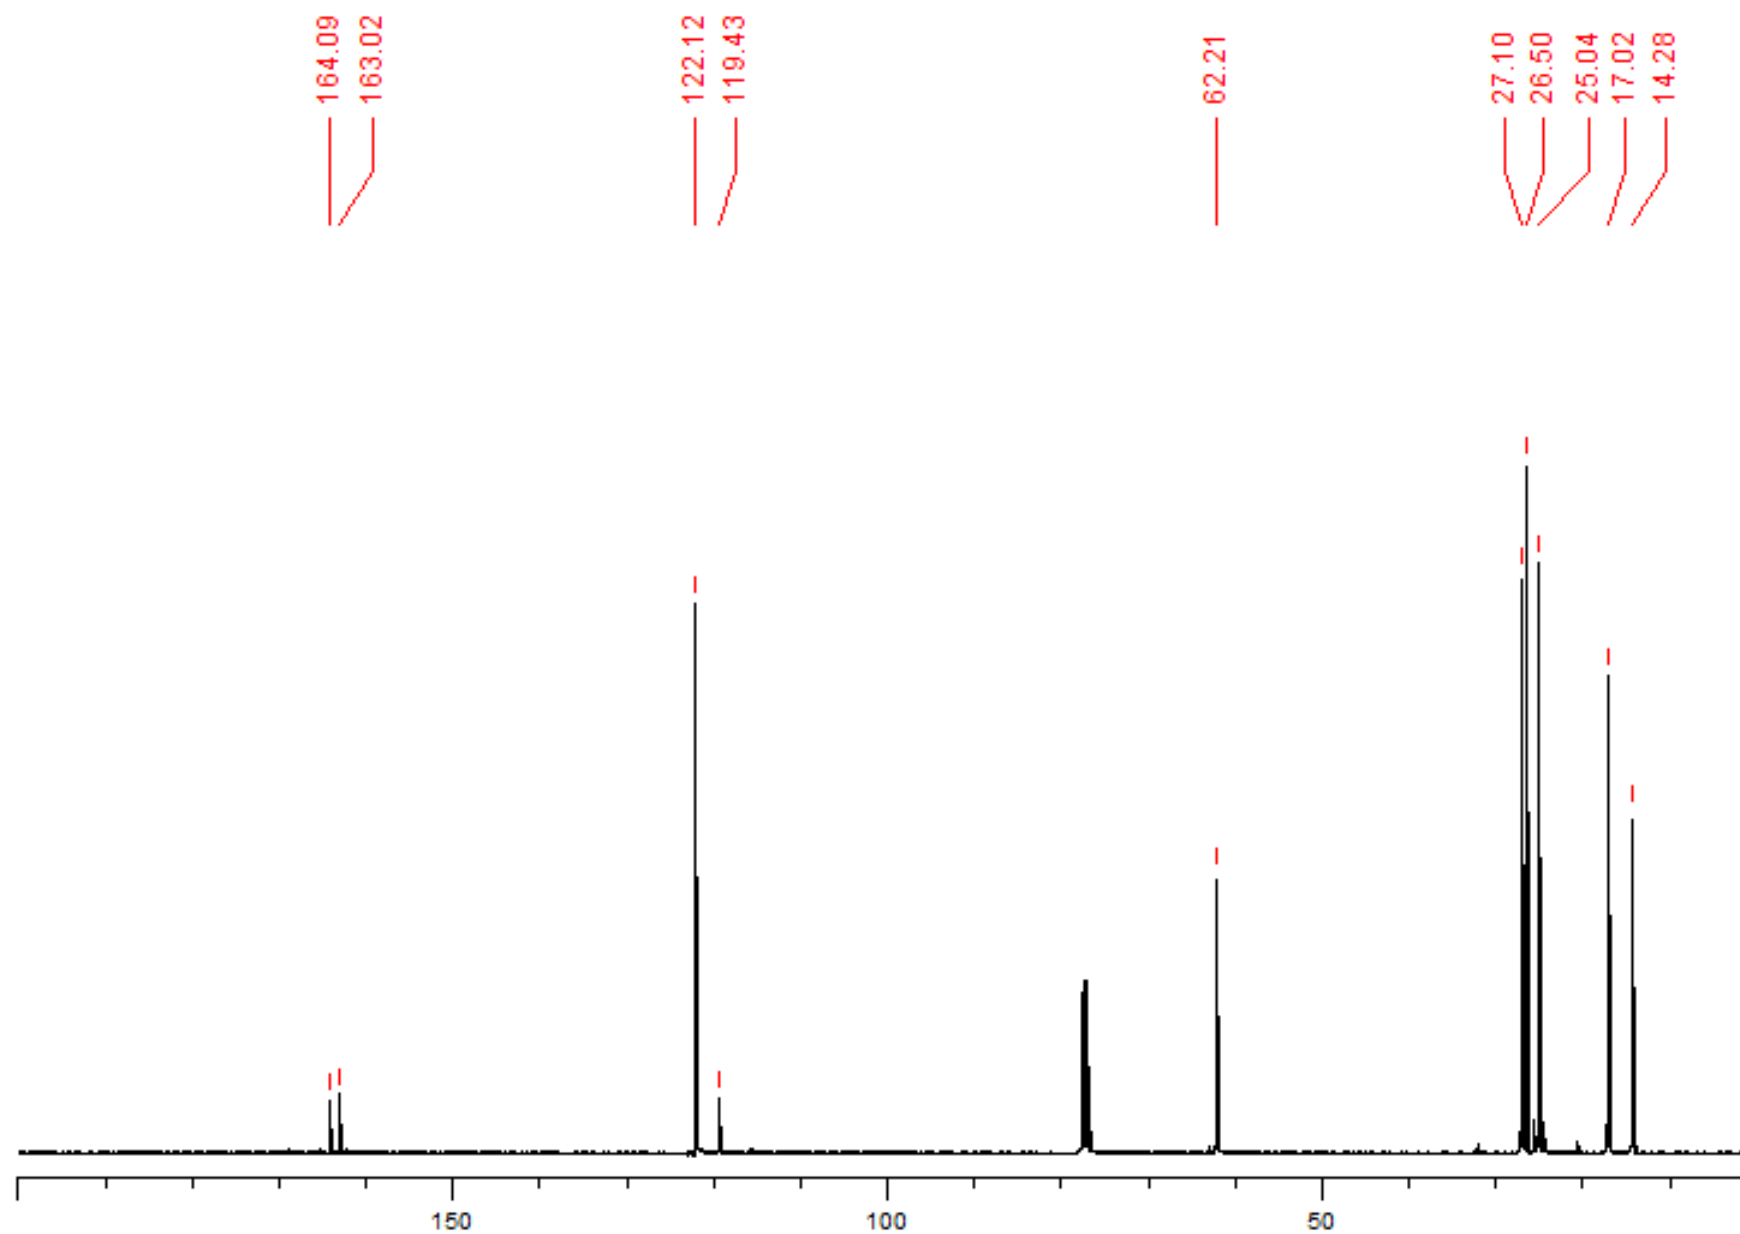

$^1\text{H}$  NMR **4e**

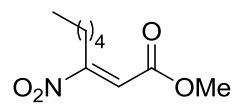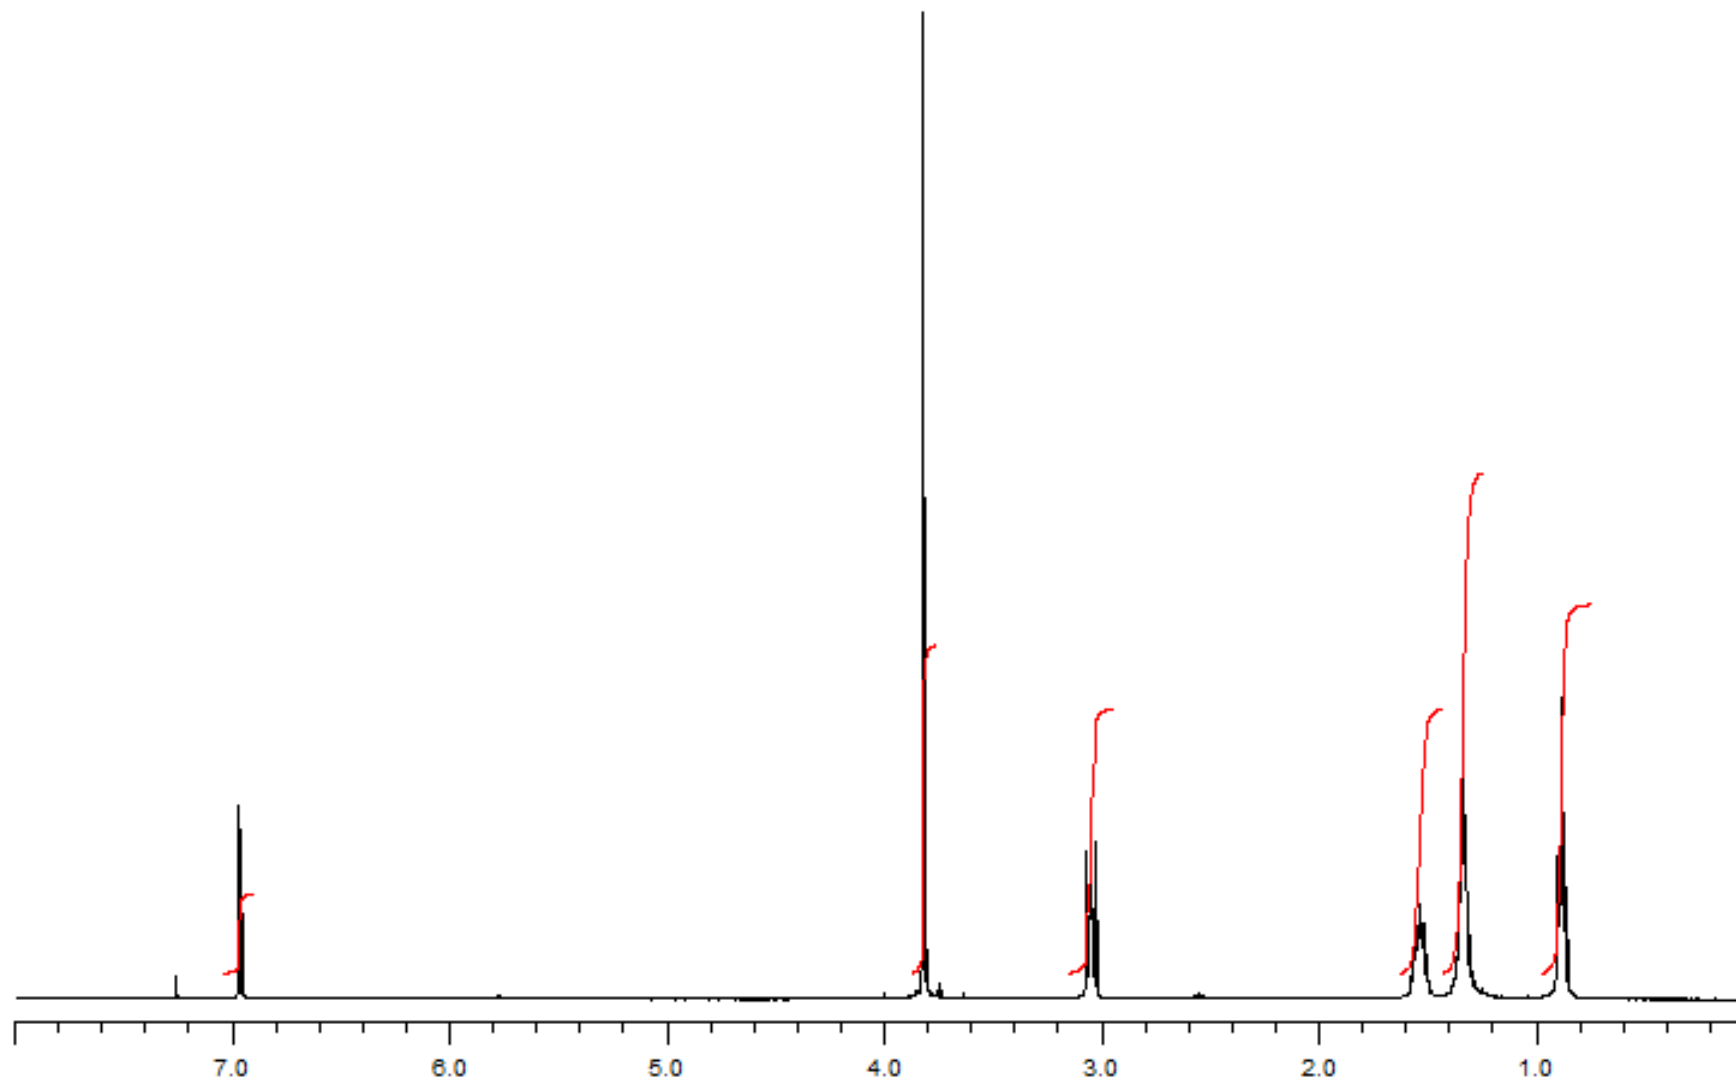

$^{13}\text{C}$  NMR 4e

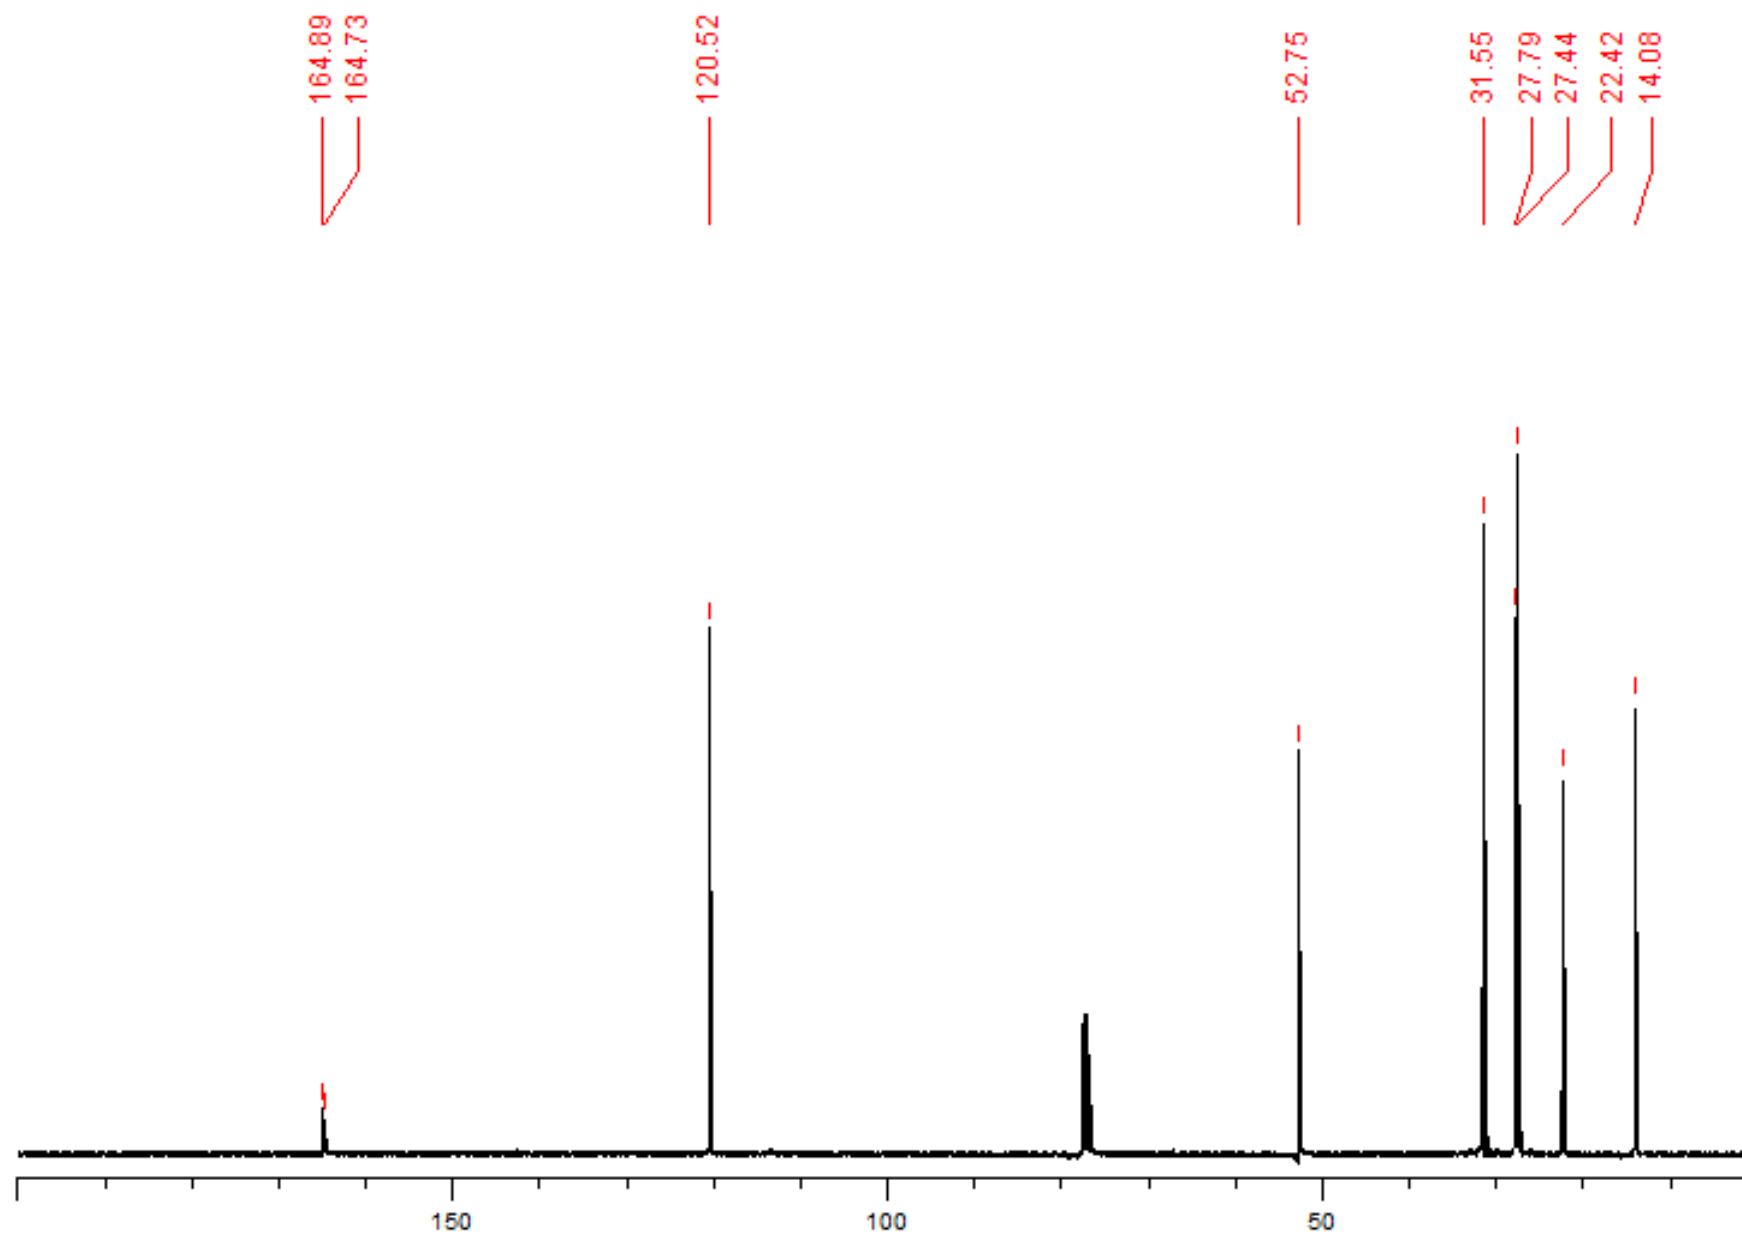

$^1\text{H}$  NMR **4f**

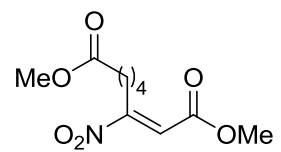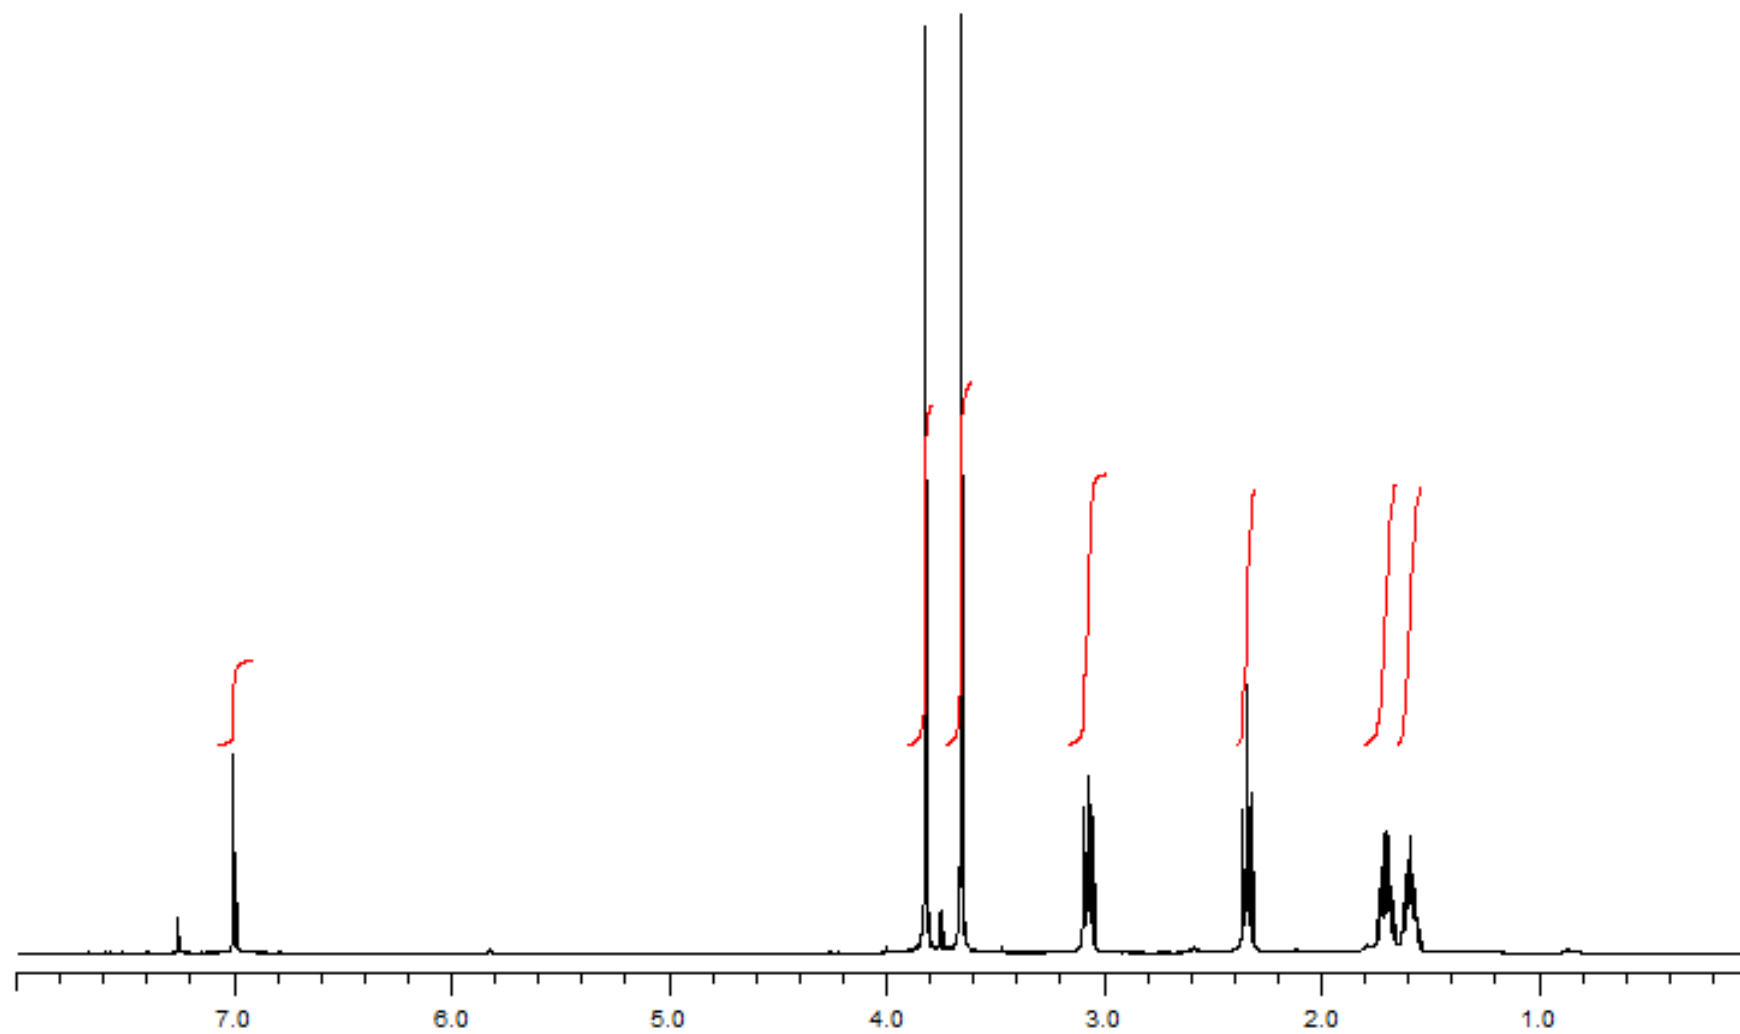

$^{13}\text{C}$  NMR 4f

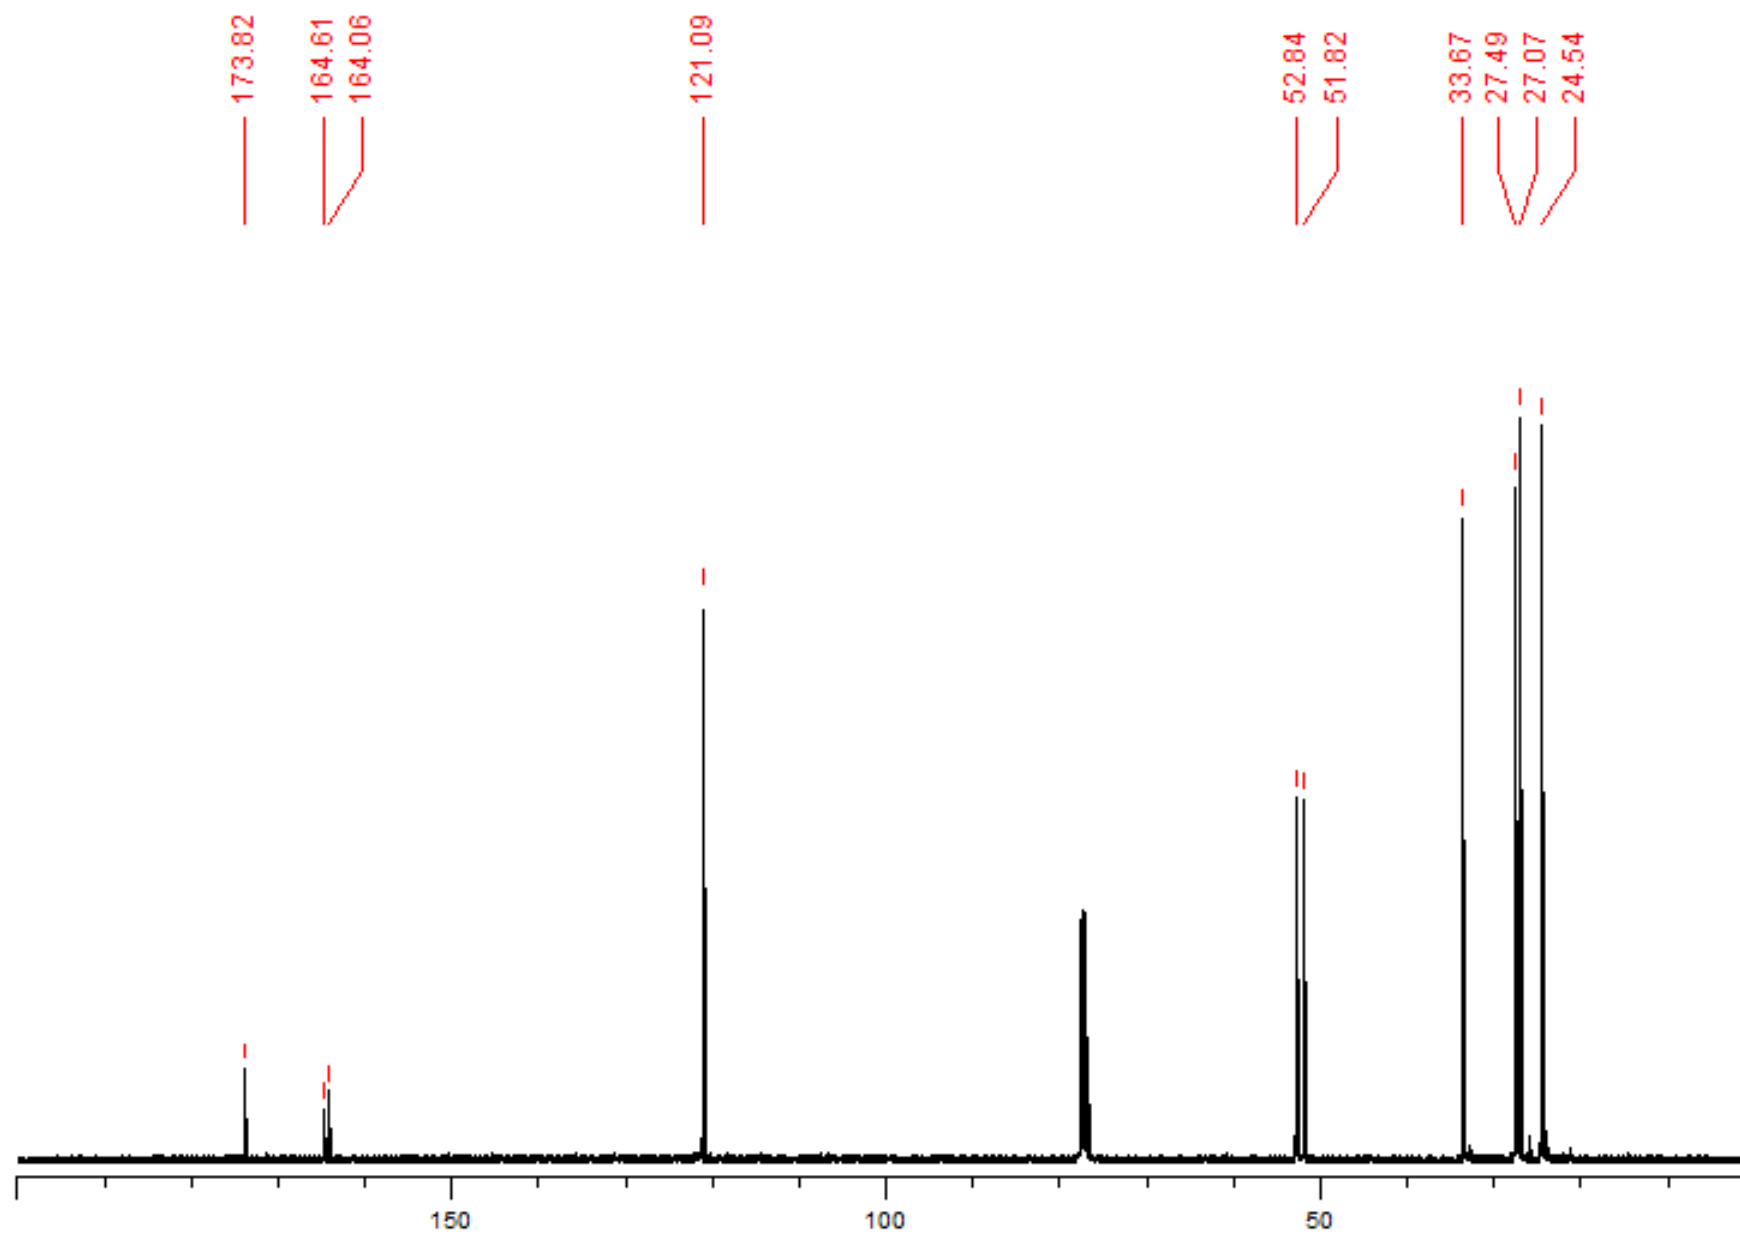

<sup>1</sup>H NMR 4g

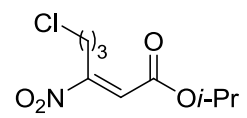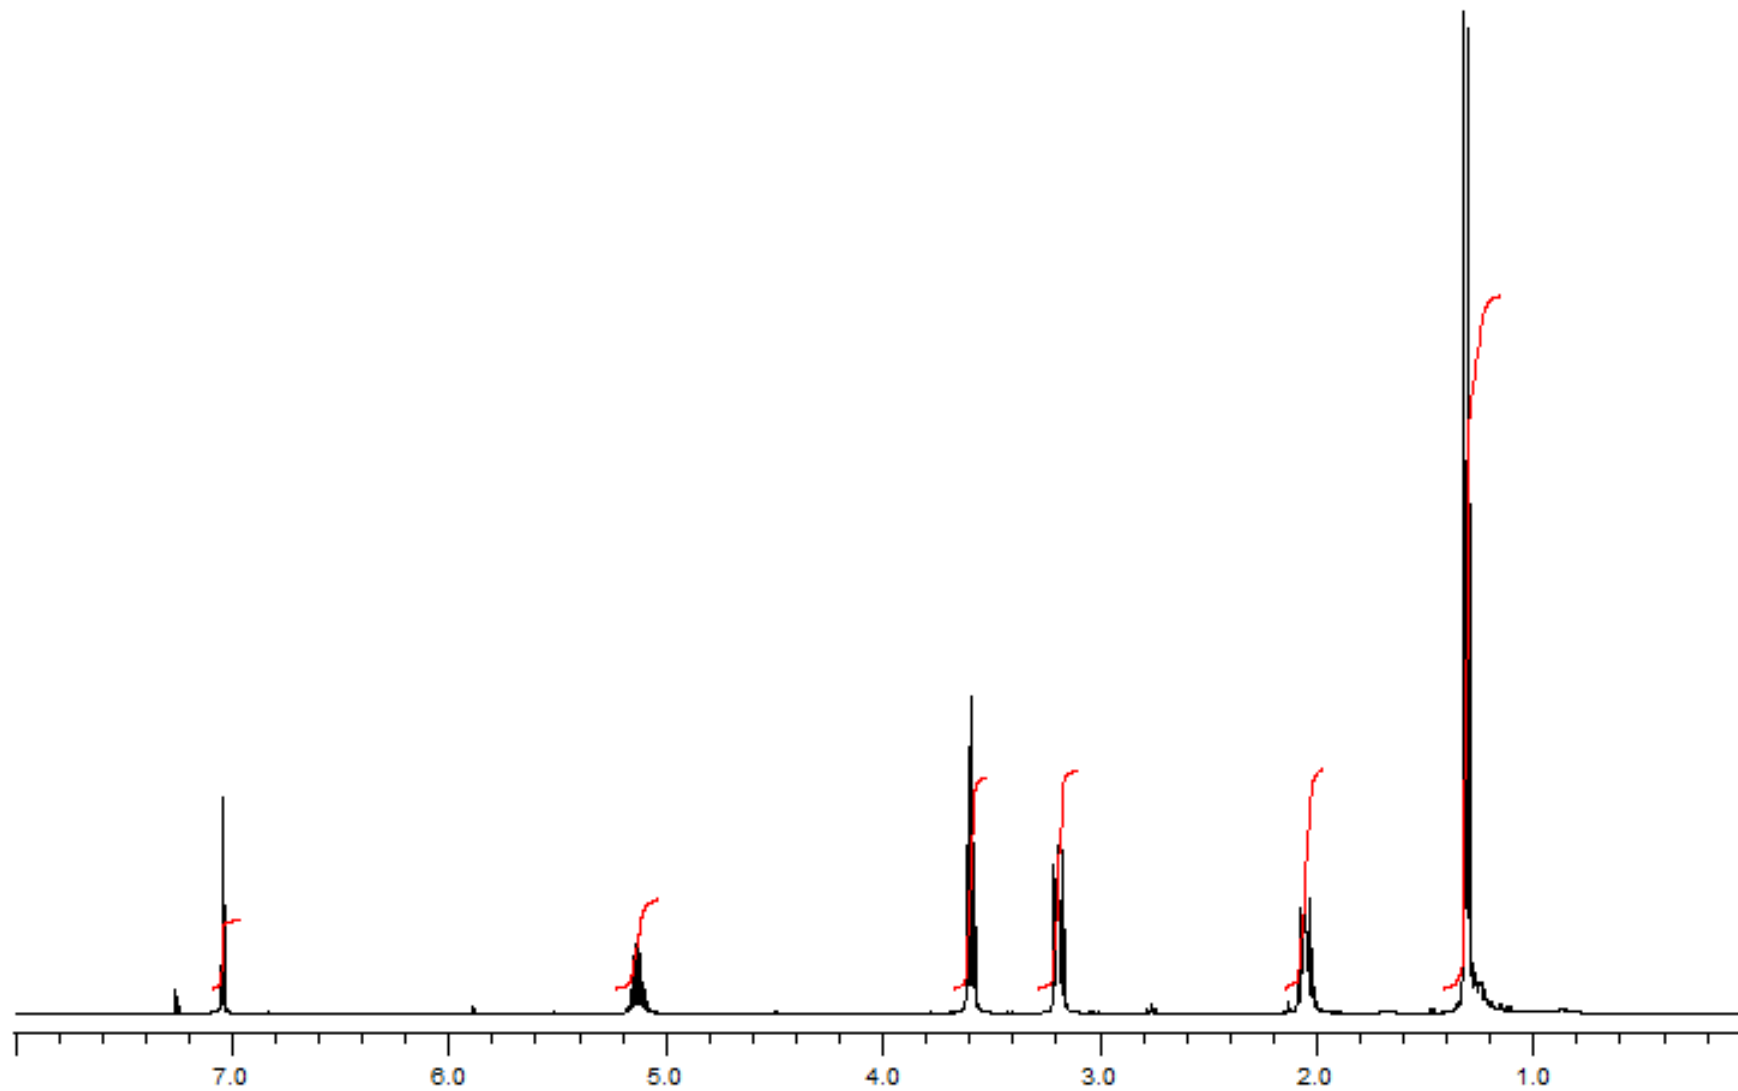

$^{13}\text{C}$  NMR 4g

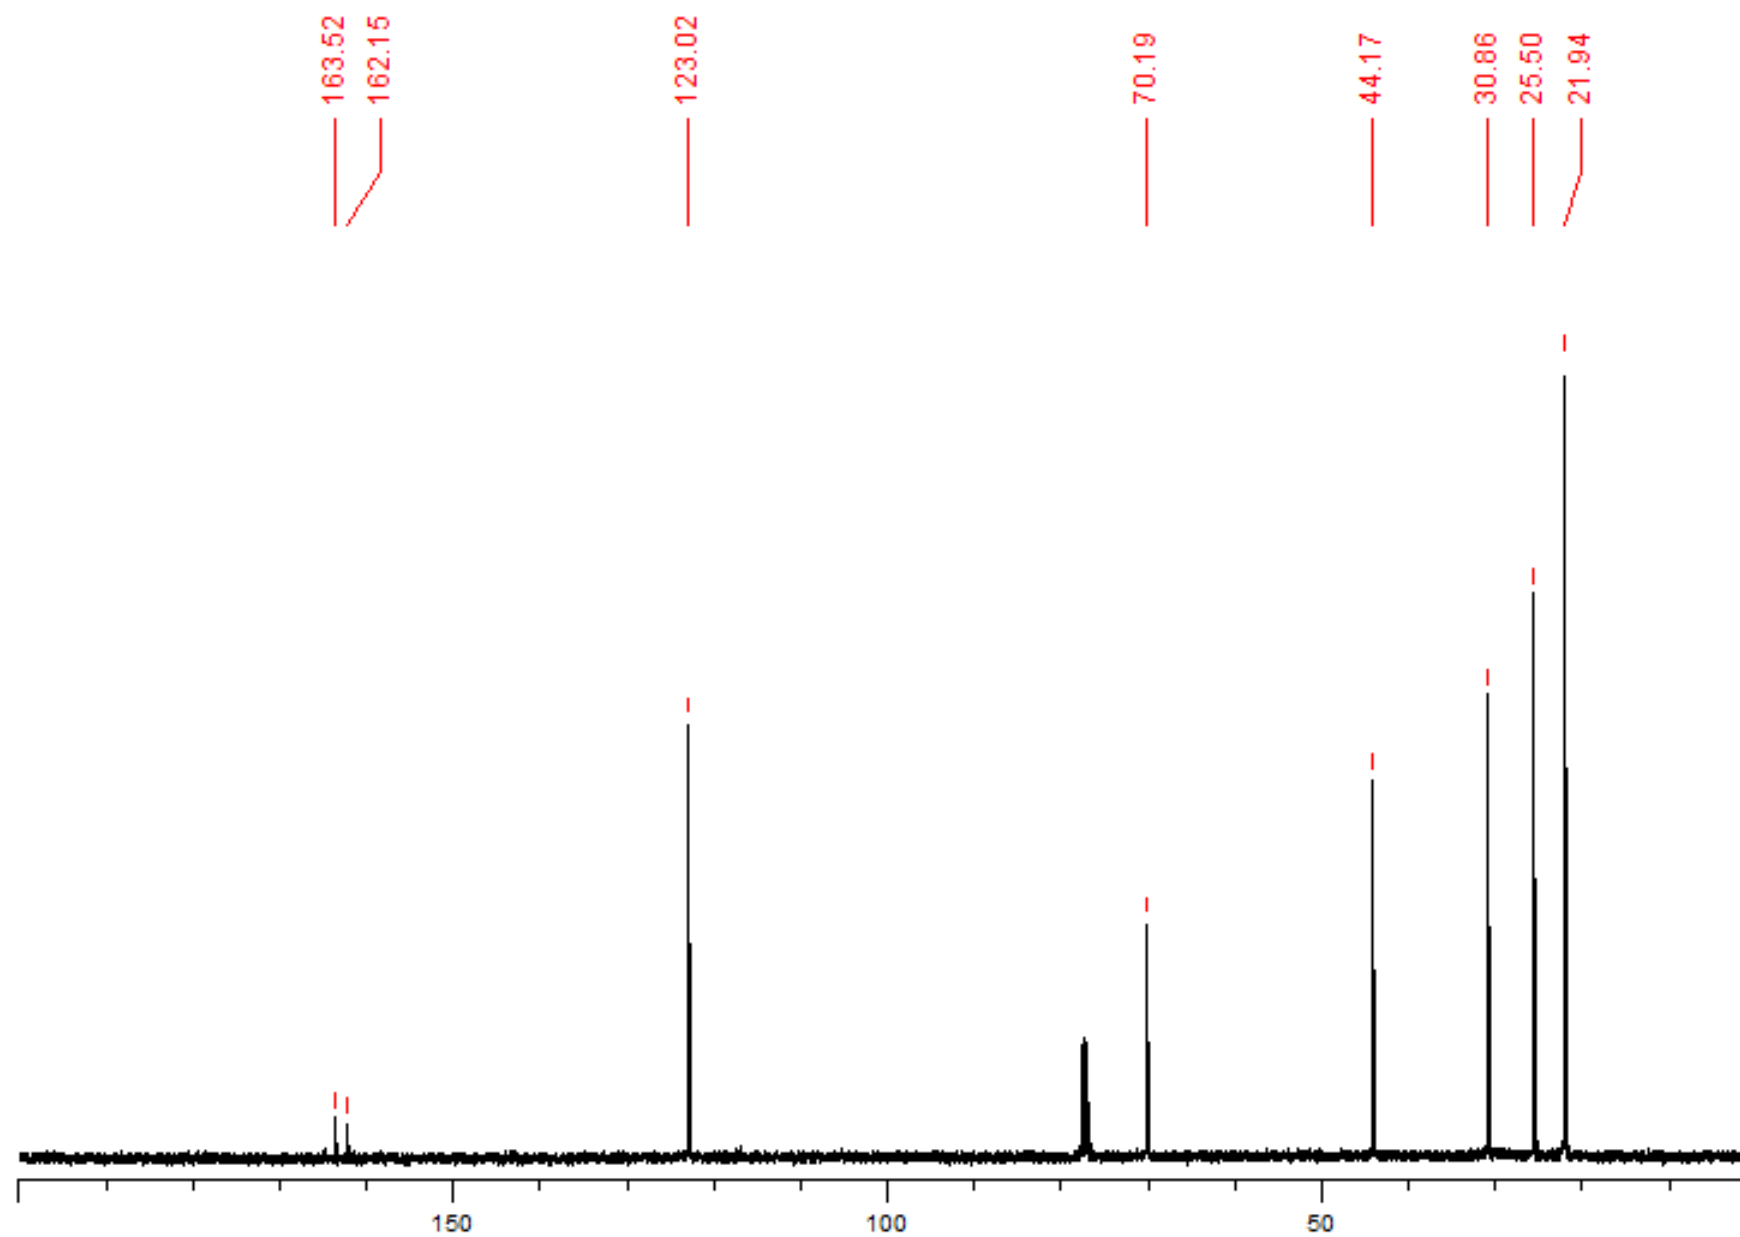



### $^1\text{H NMR}$ **4h**

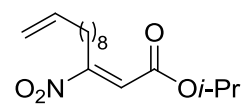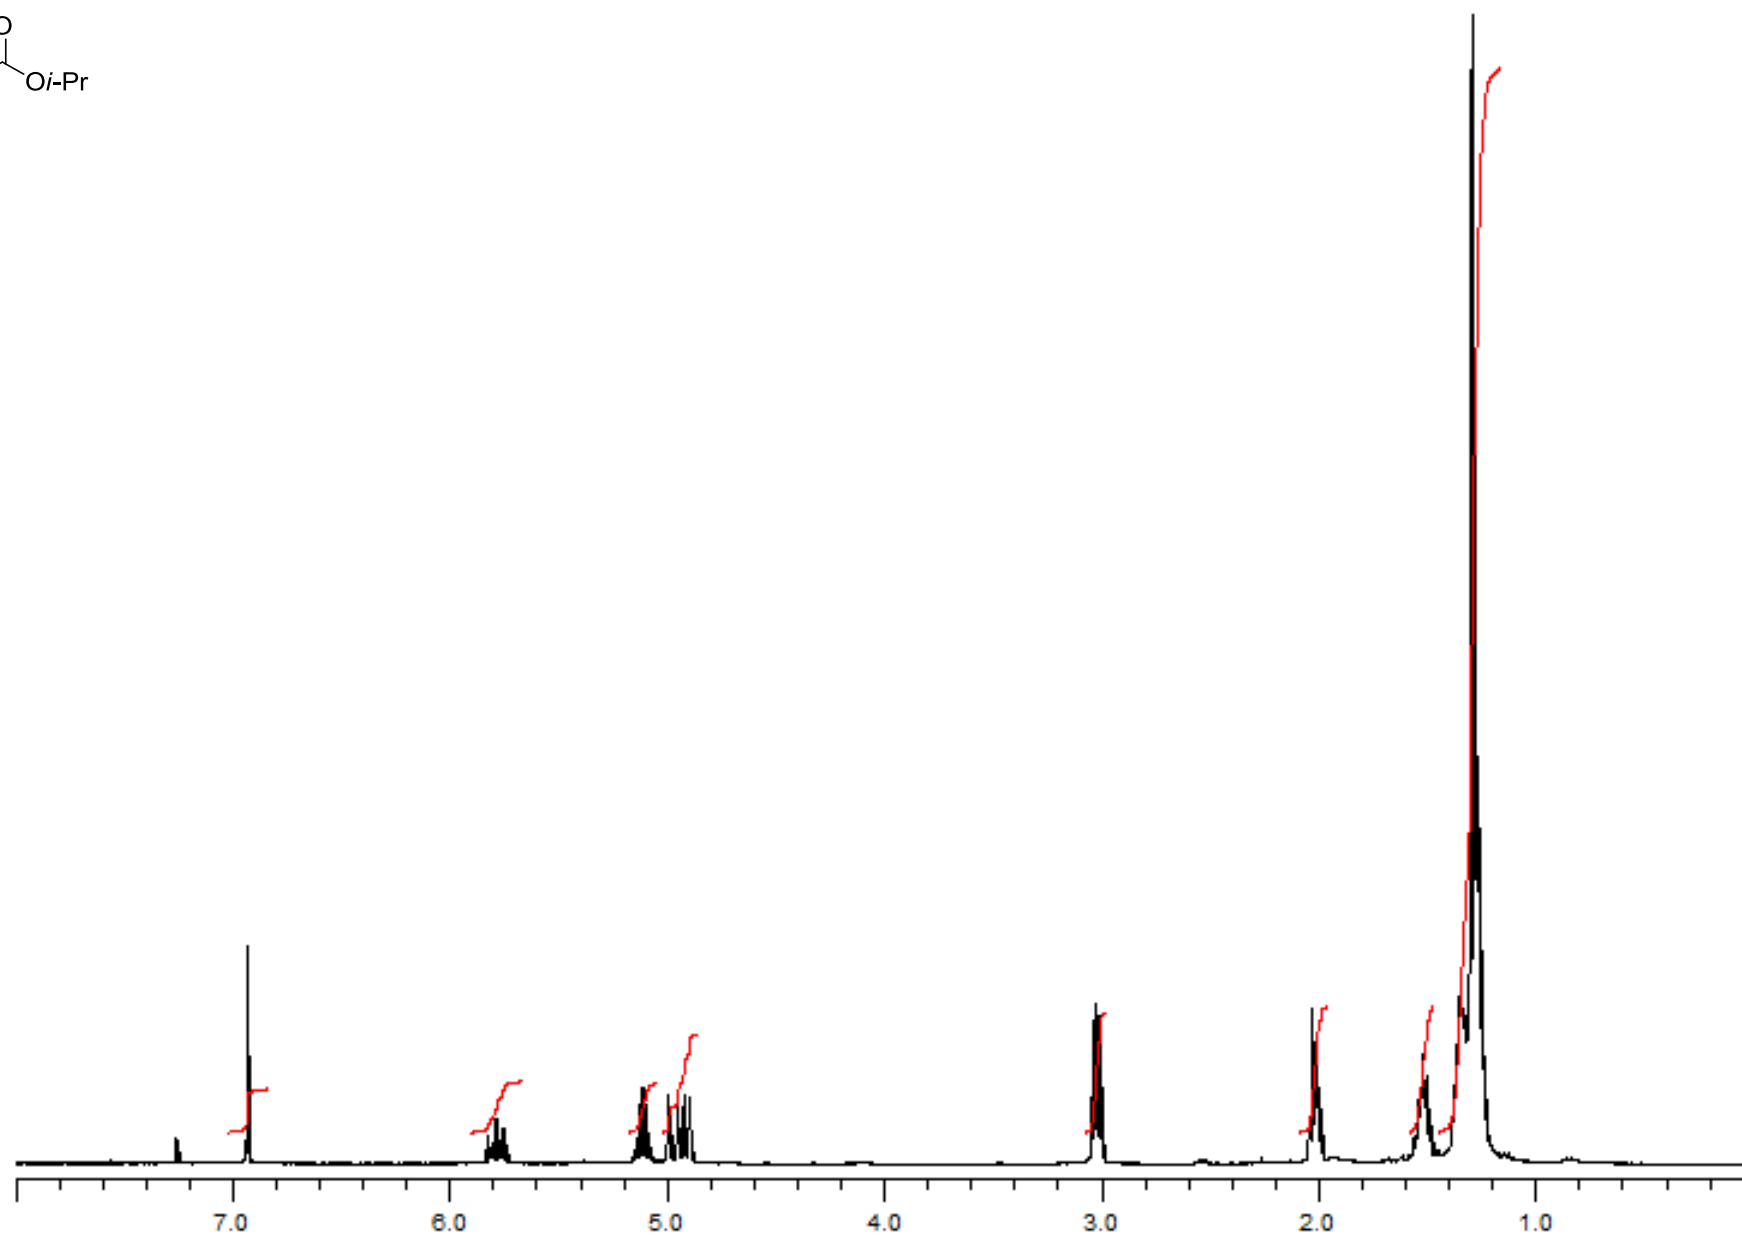

$^{13}\text{C}$  NMR 4h

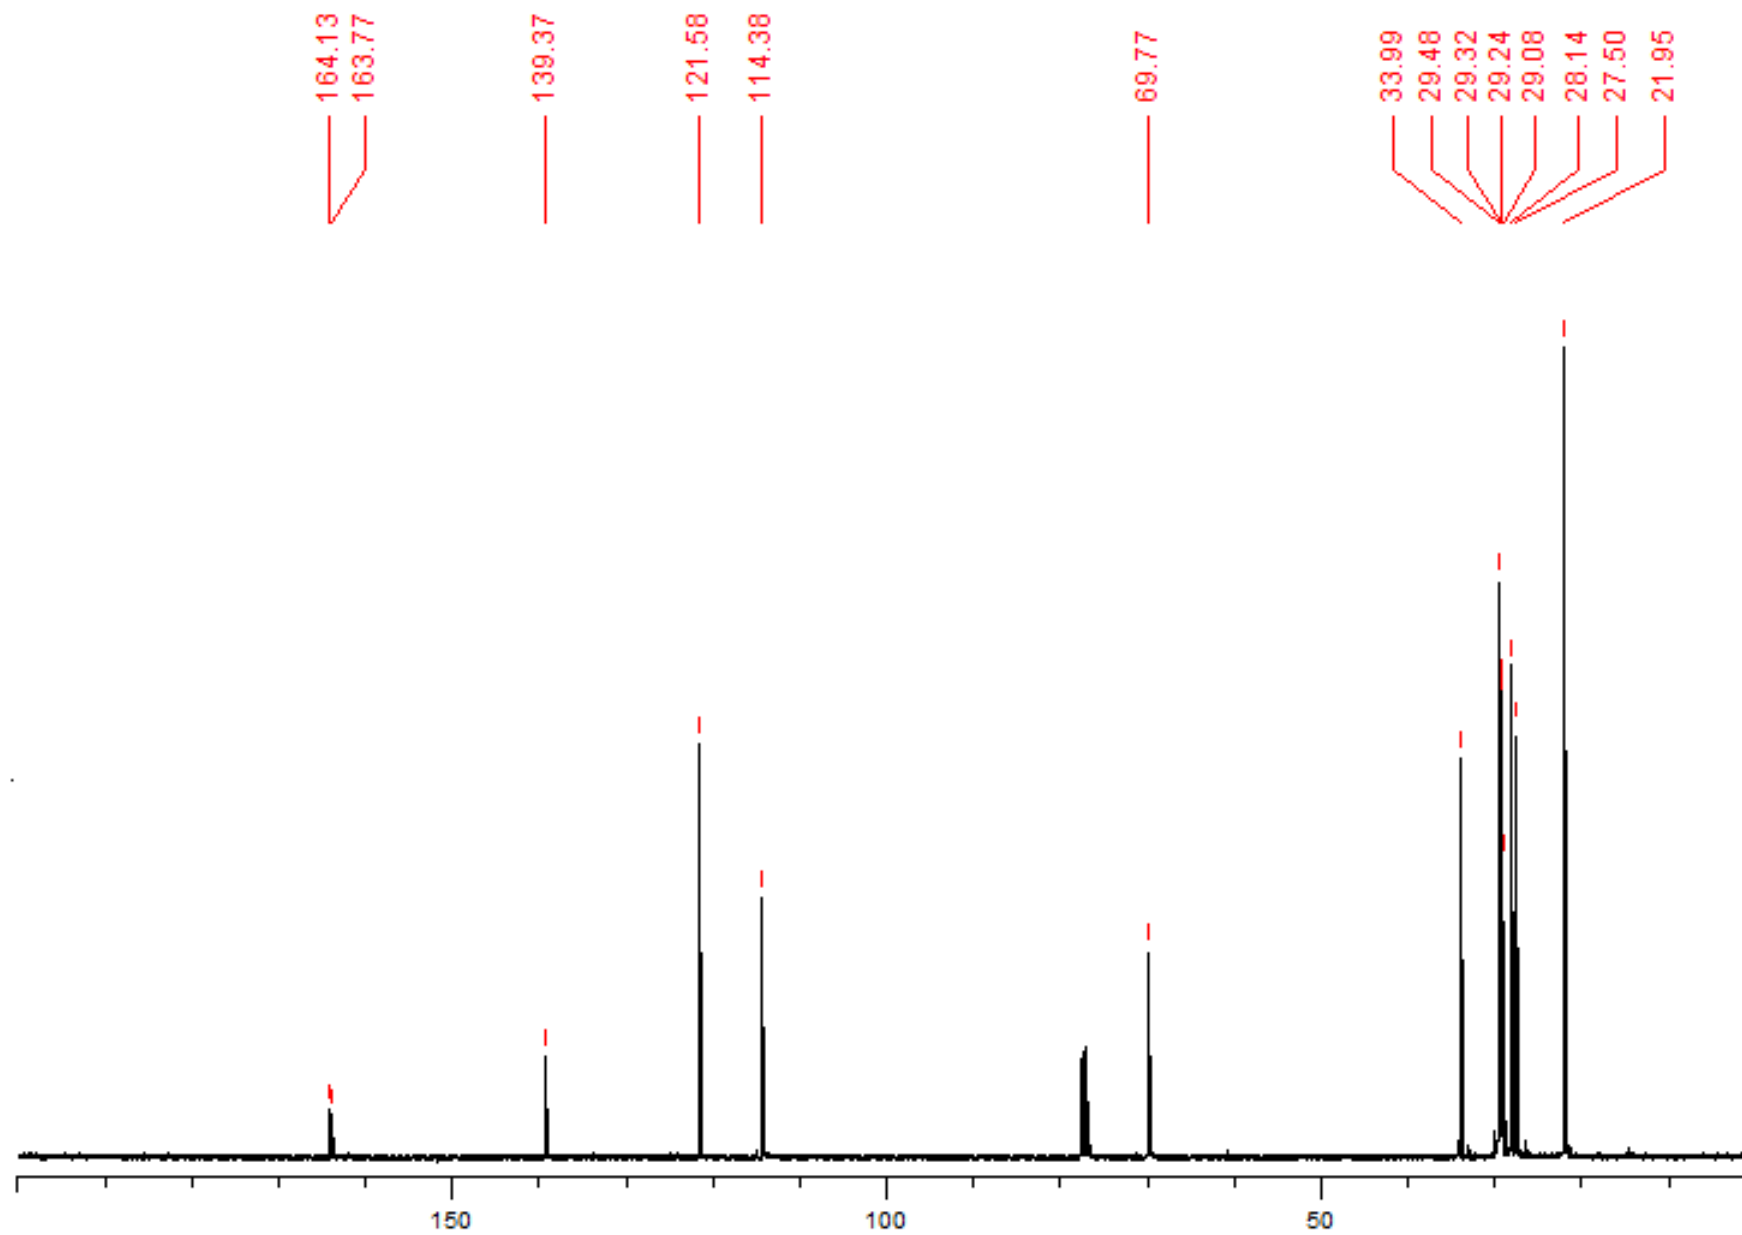

**<sup>1</sup>H NMR 4i**

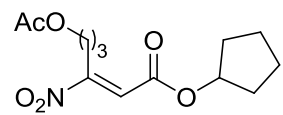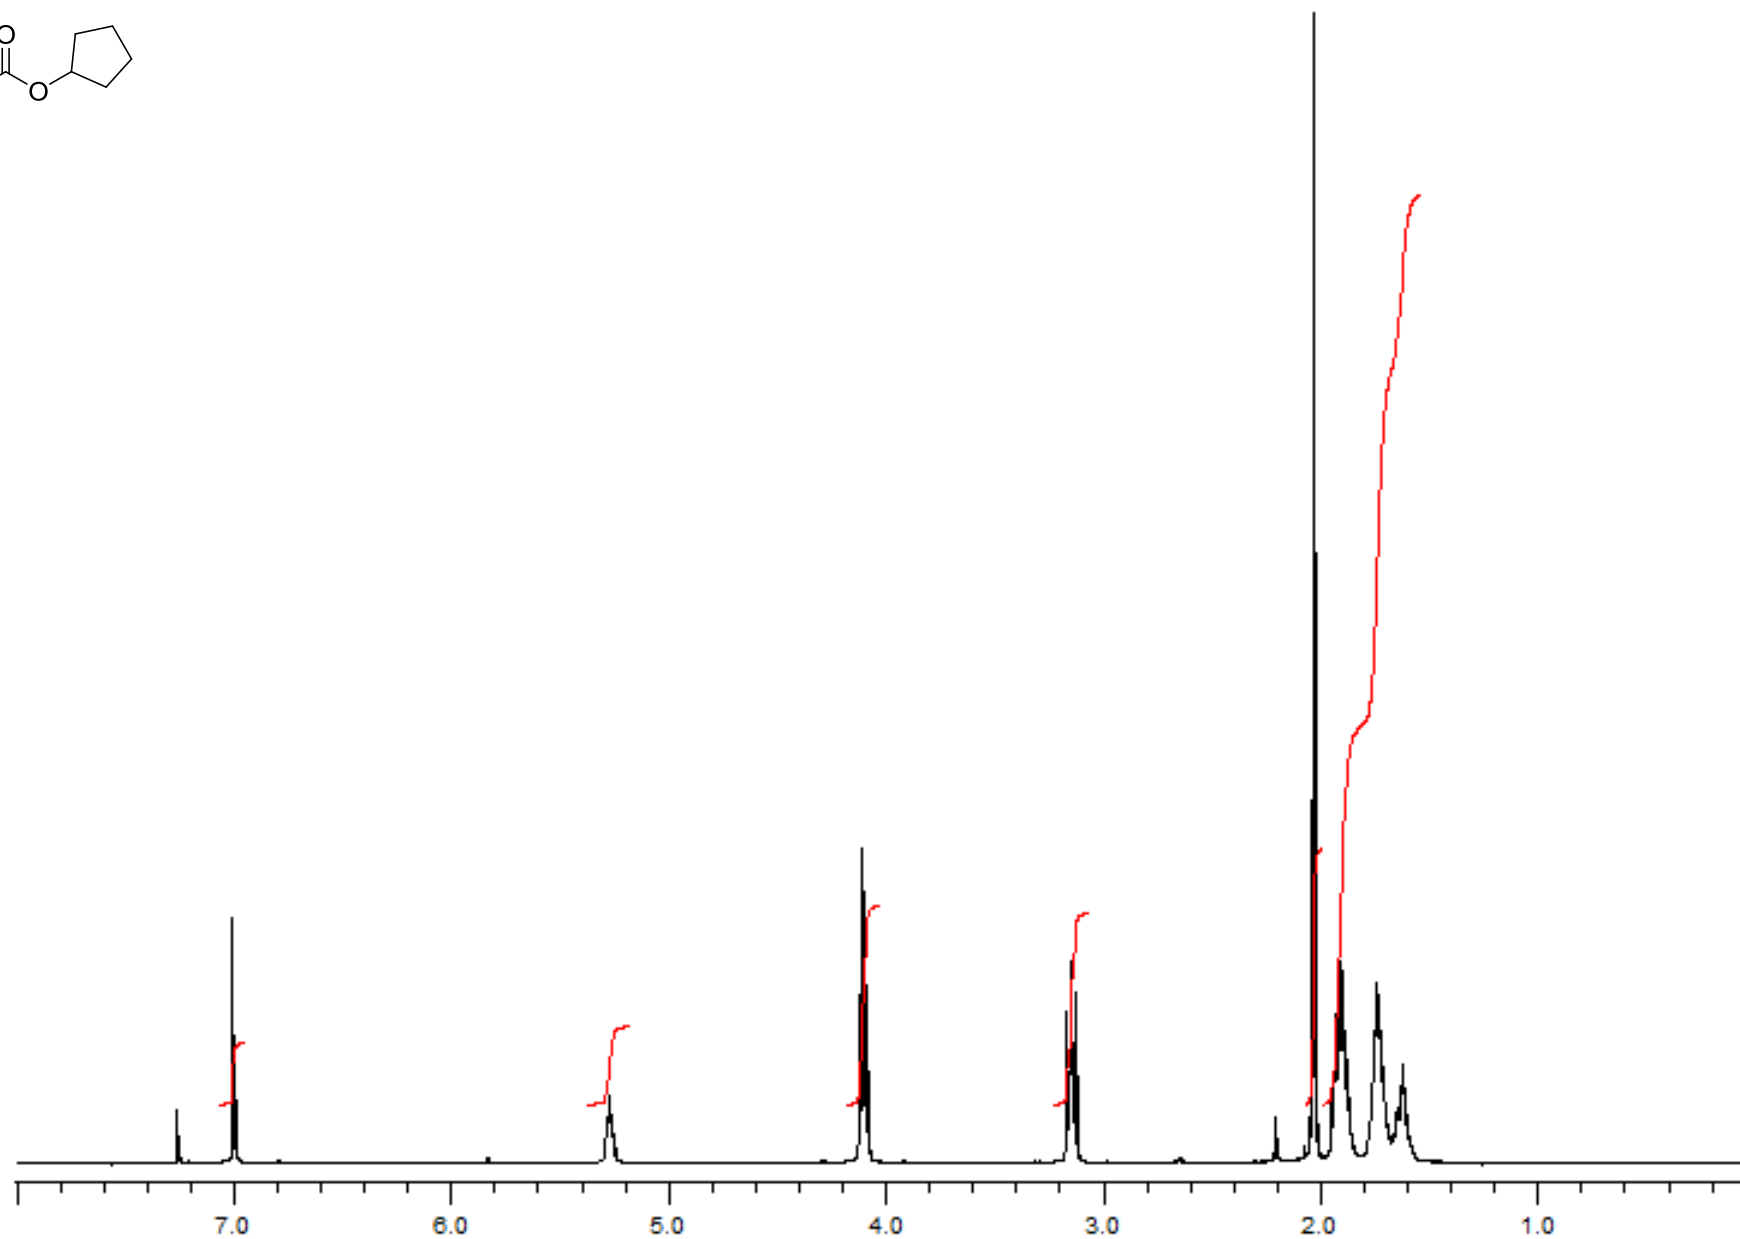

$^{13}\text{C}$  NMR 4i

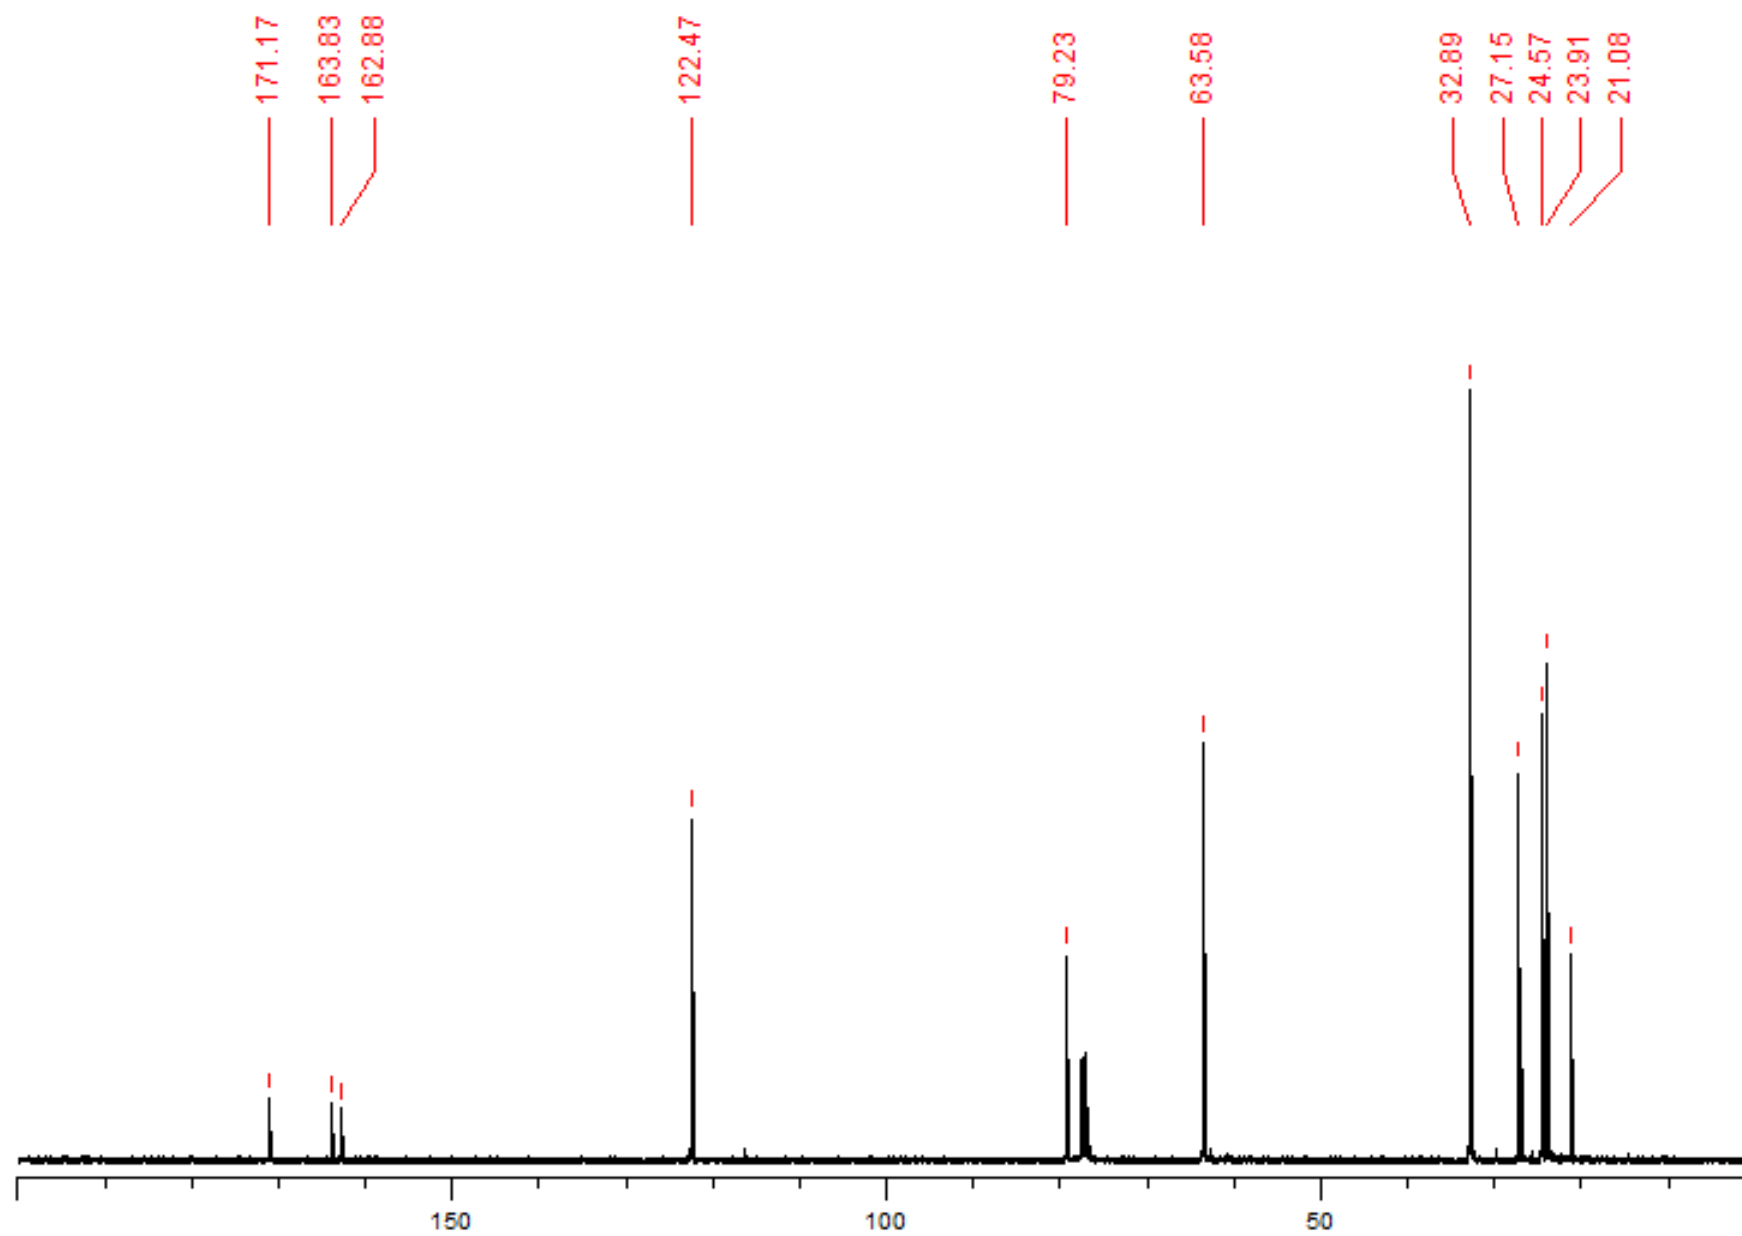

### $^1\text{H}$ NMR 4j

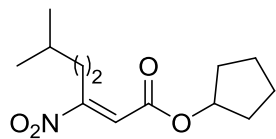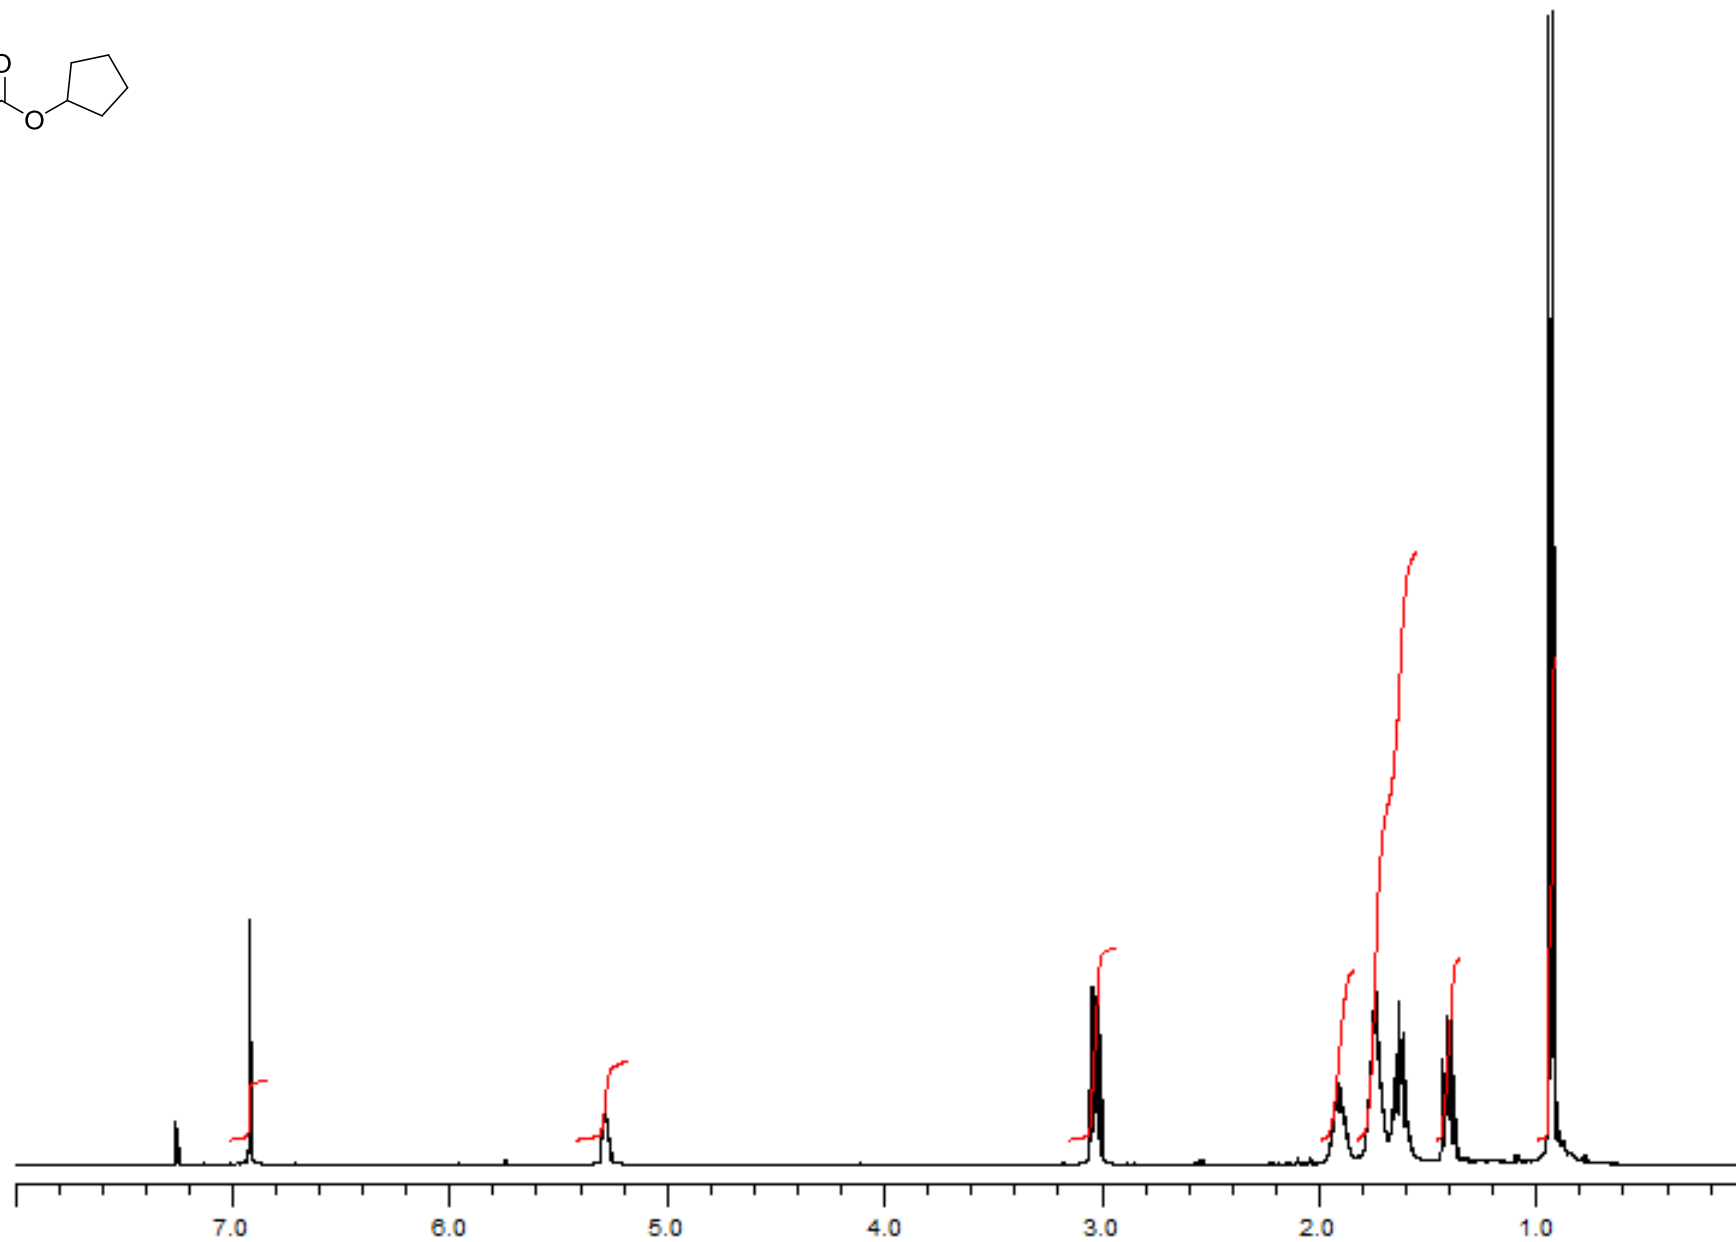

$^{13}\text{C}$  NMR 4j

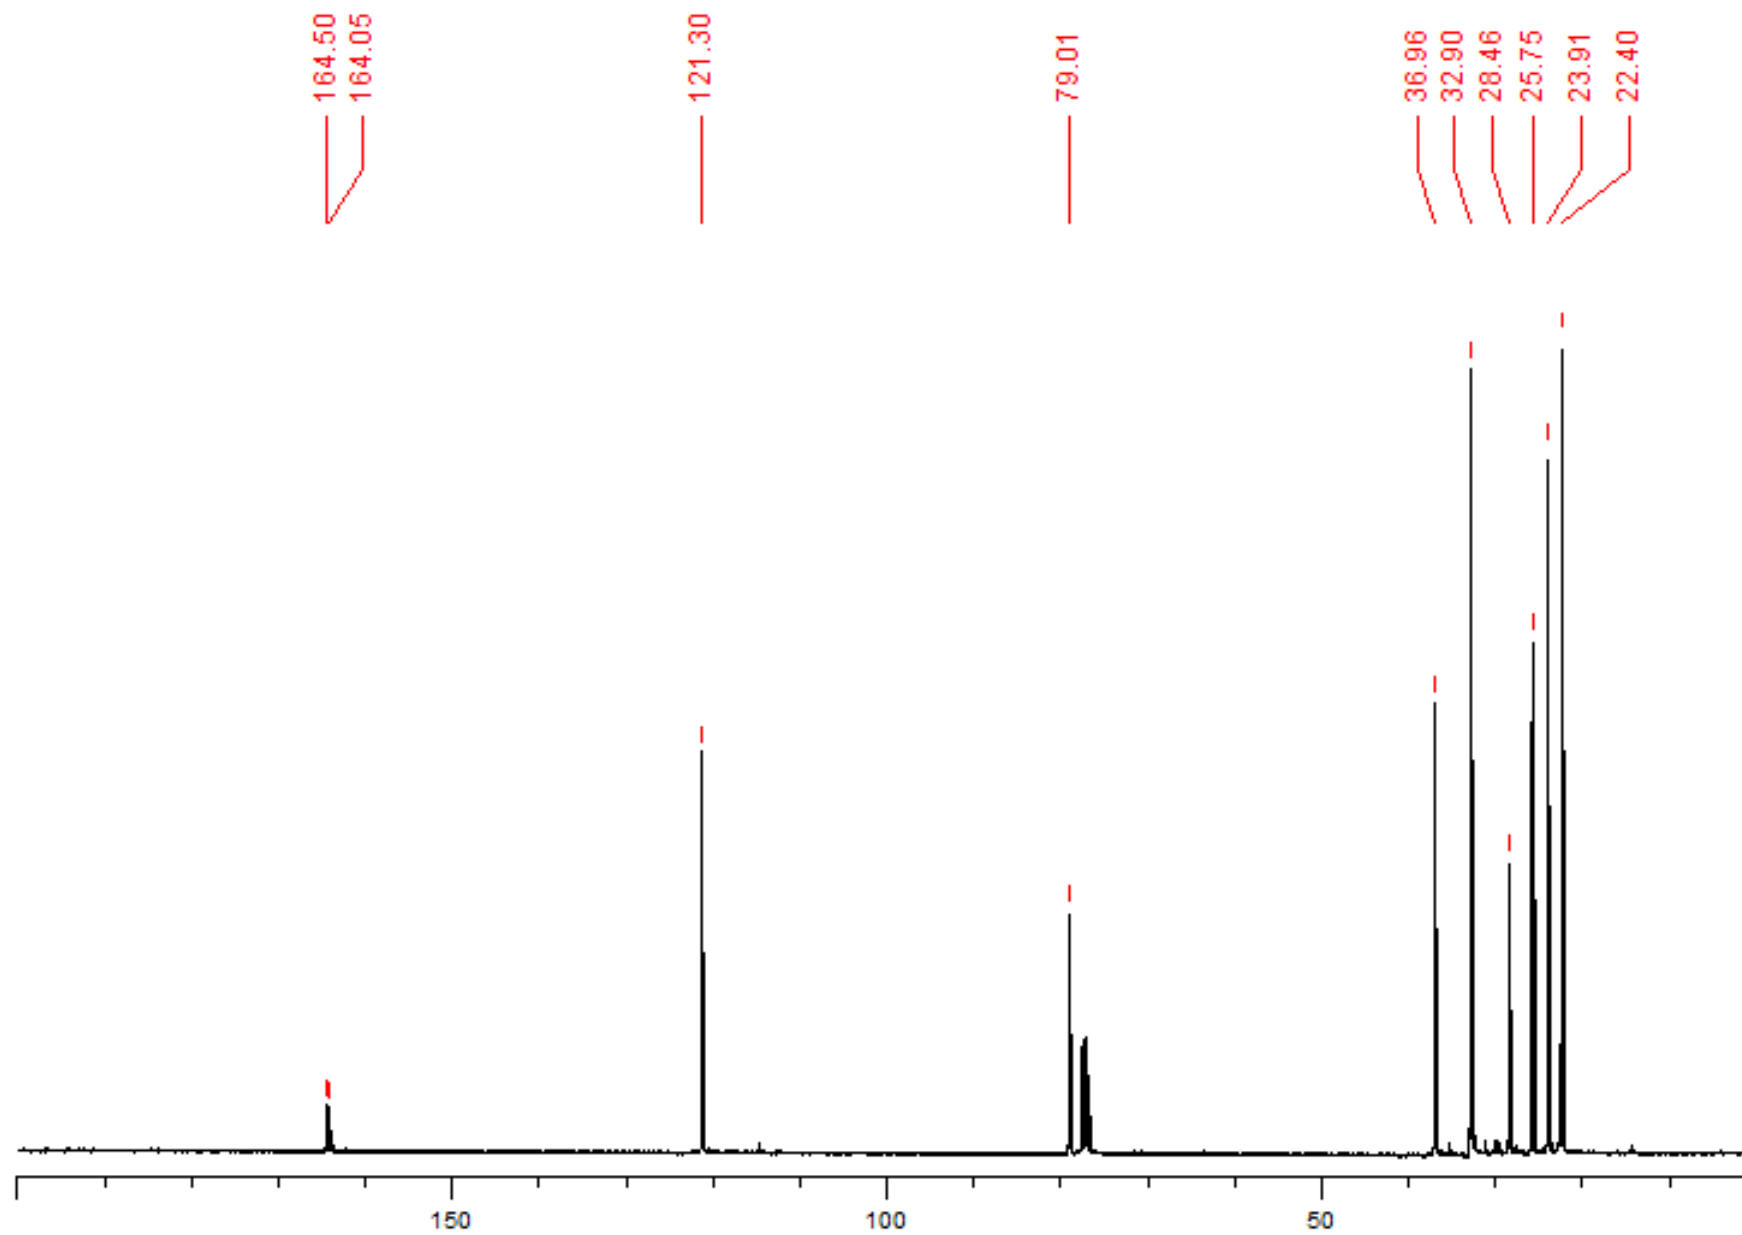

$^1\text{H}$  NMR **4k**

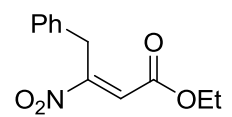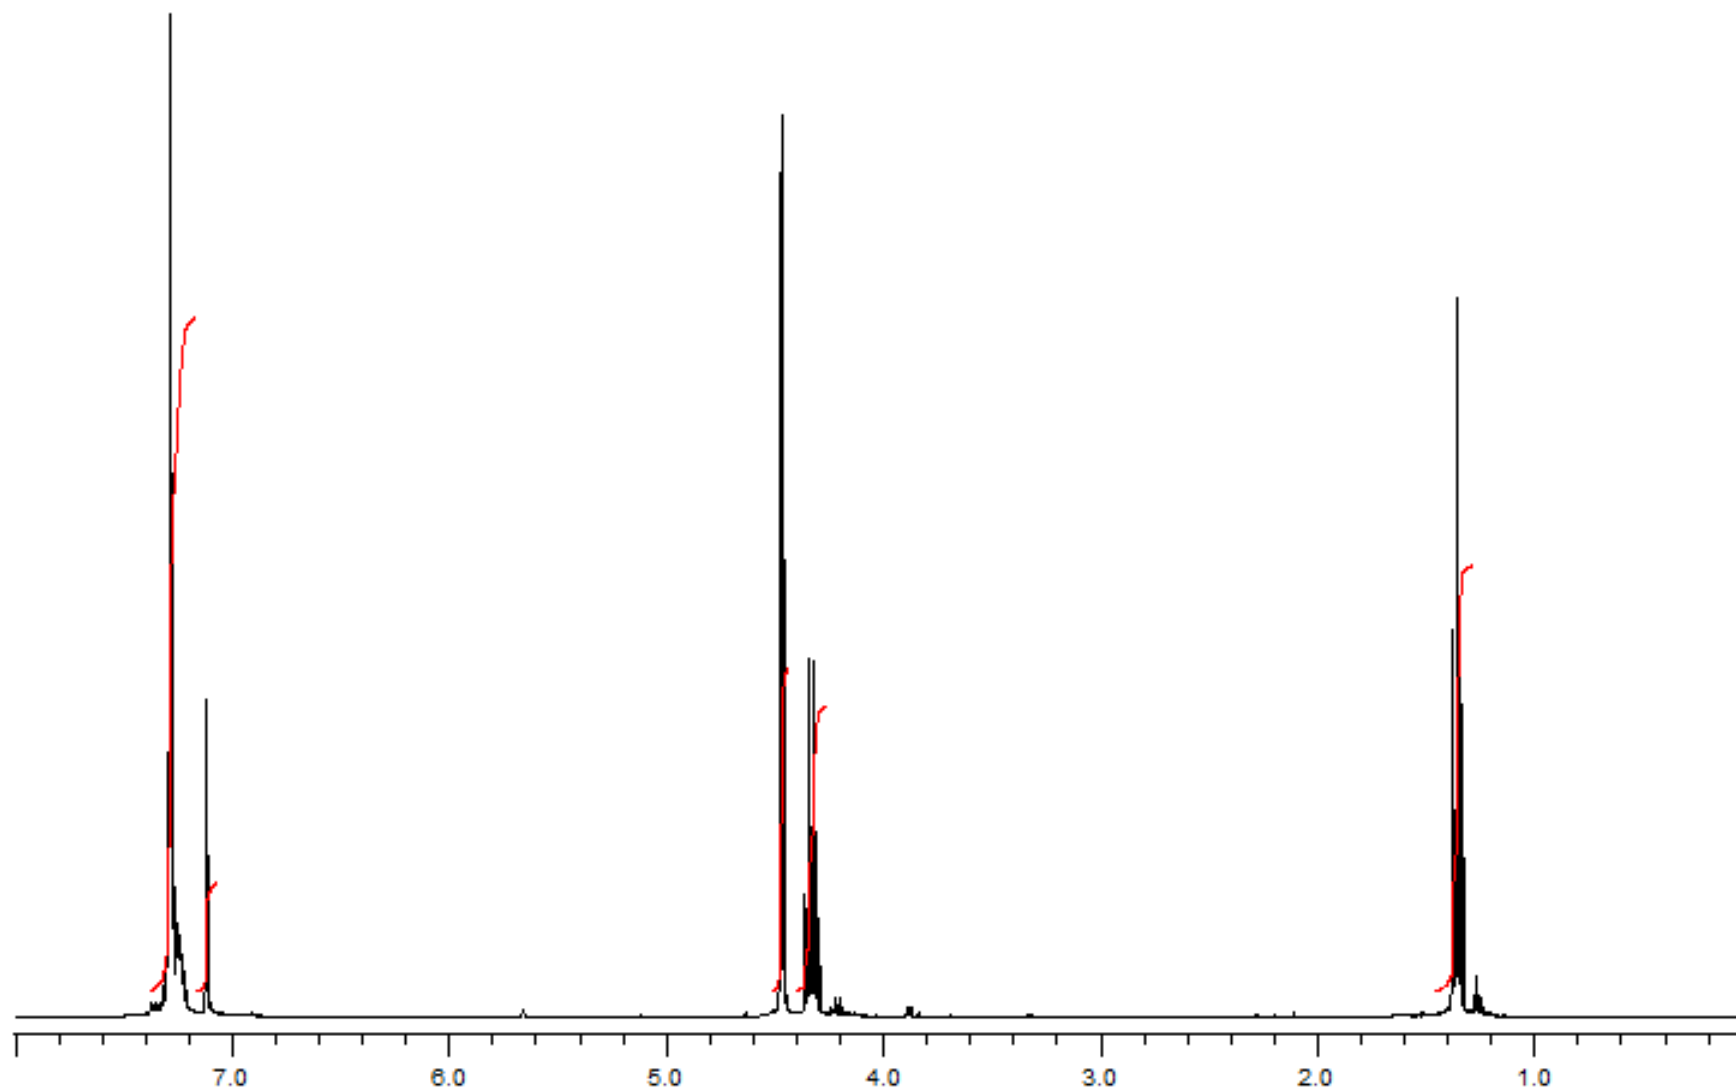

$^{13}\text{C}$  NMR 4k

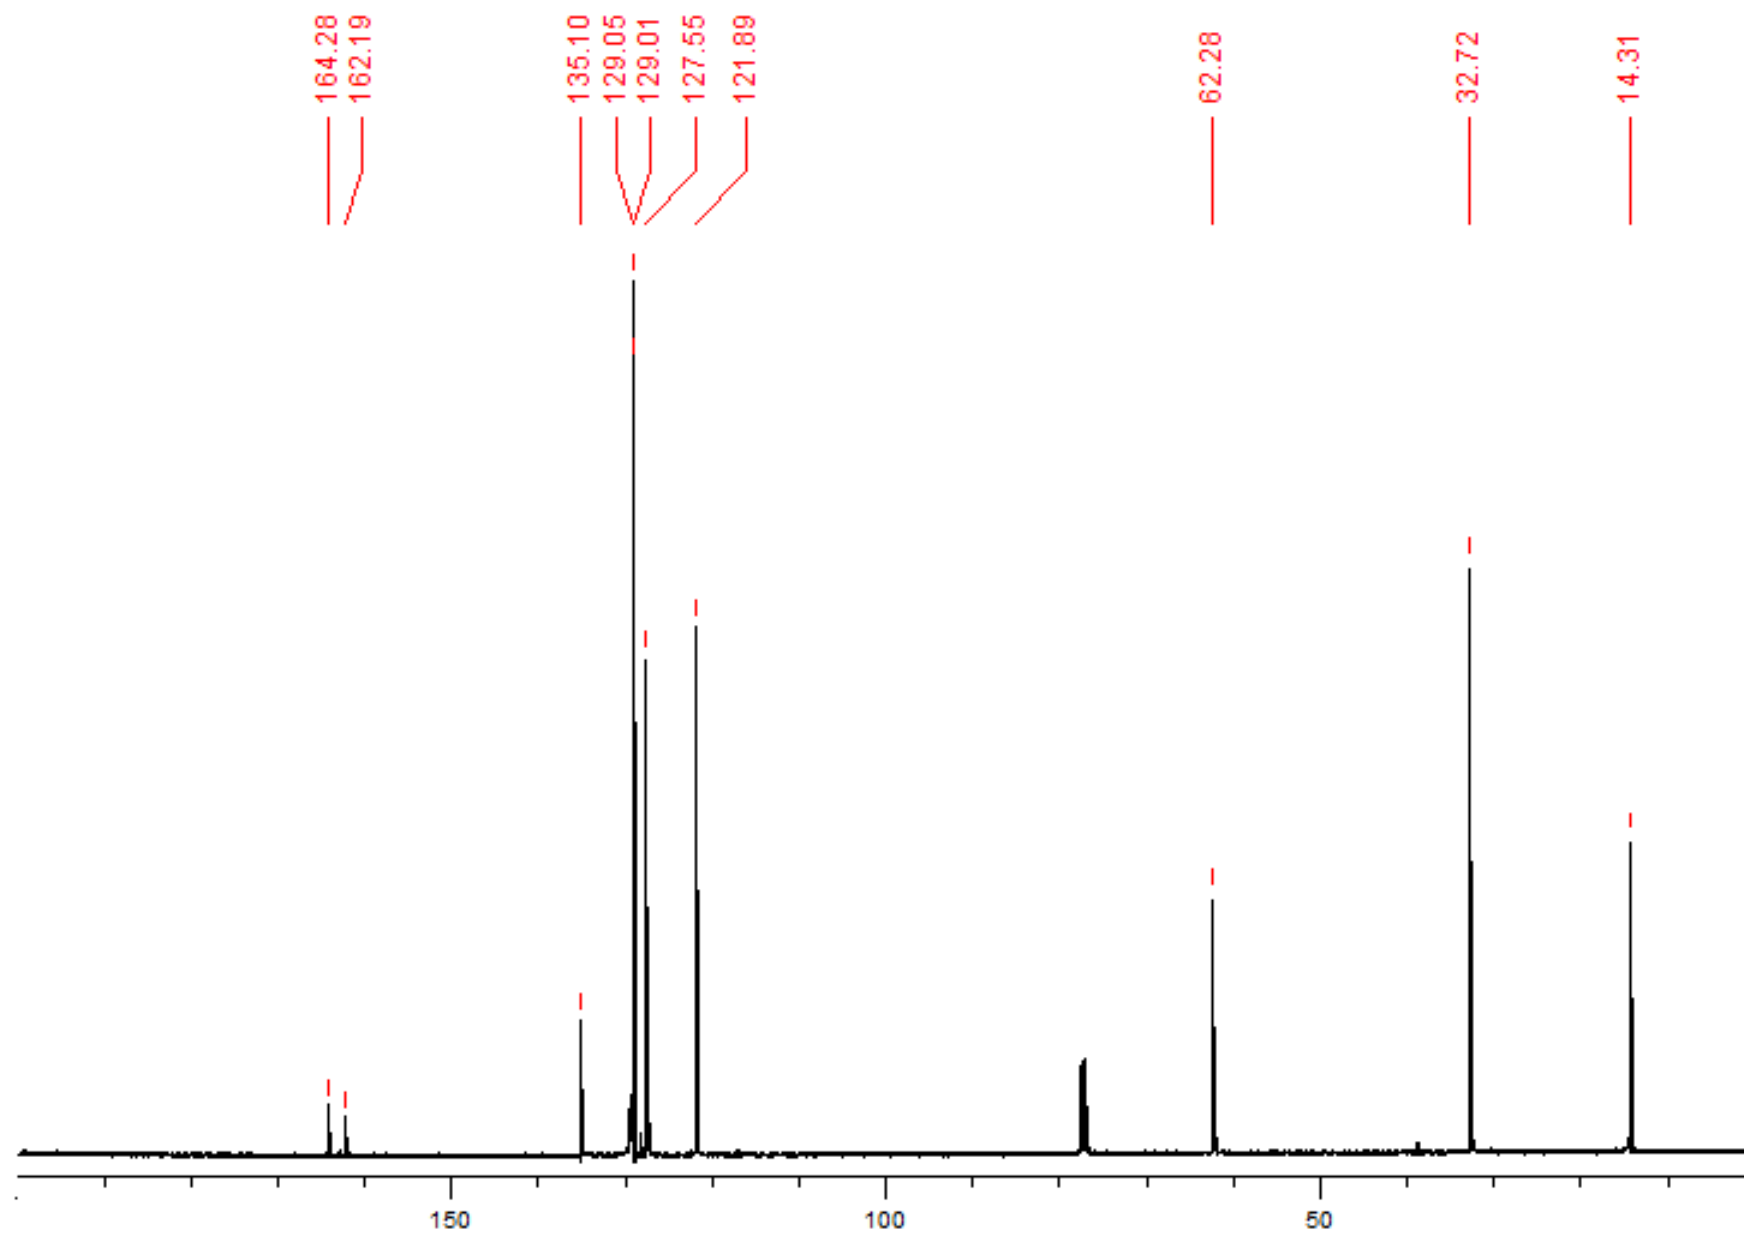



$^1\text{H}$  NMR **4I**

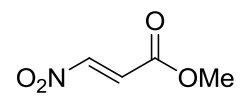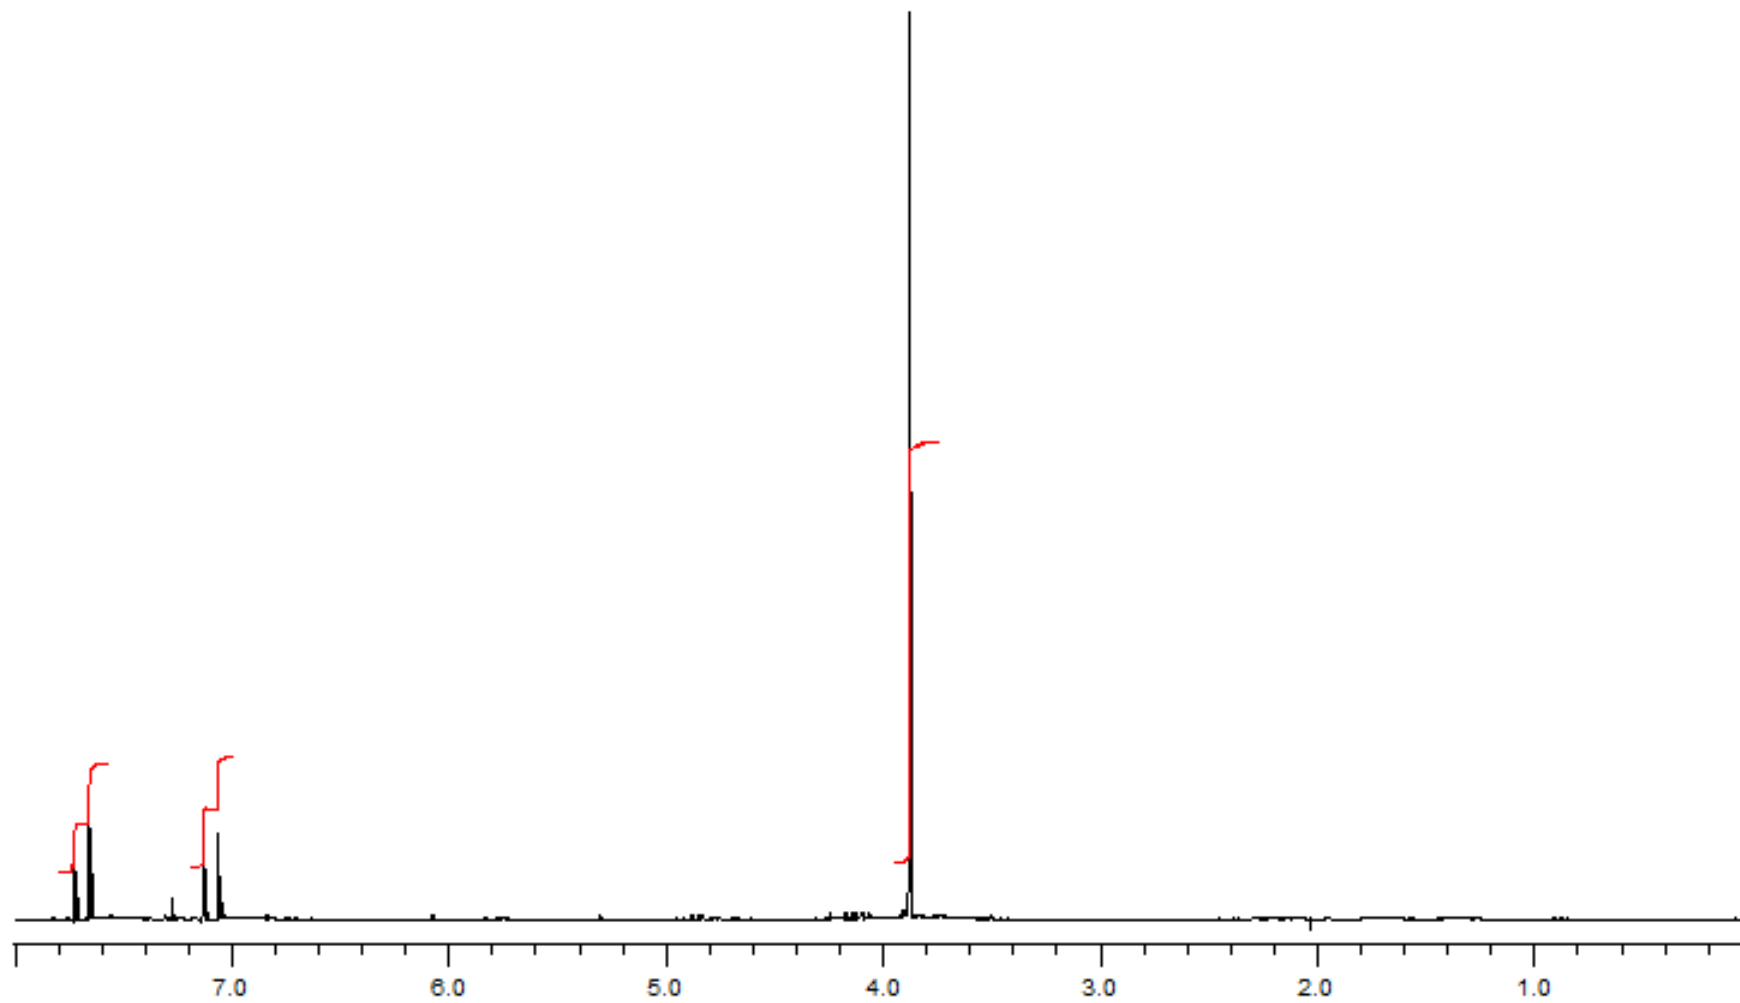

$^{13}\text{C}$  NMR 4I

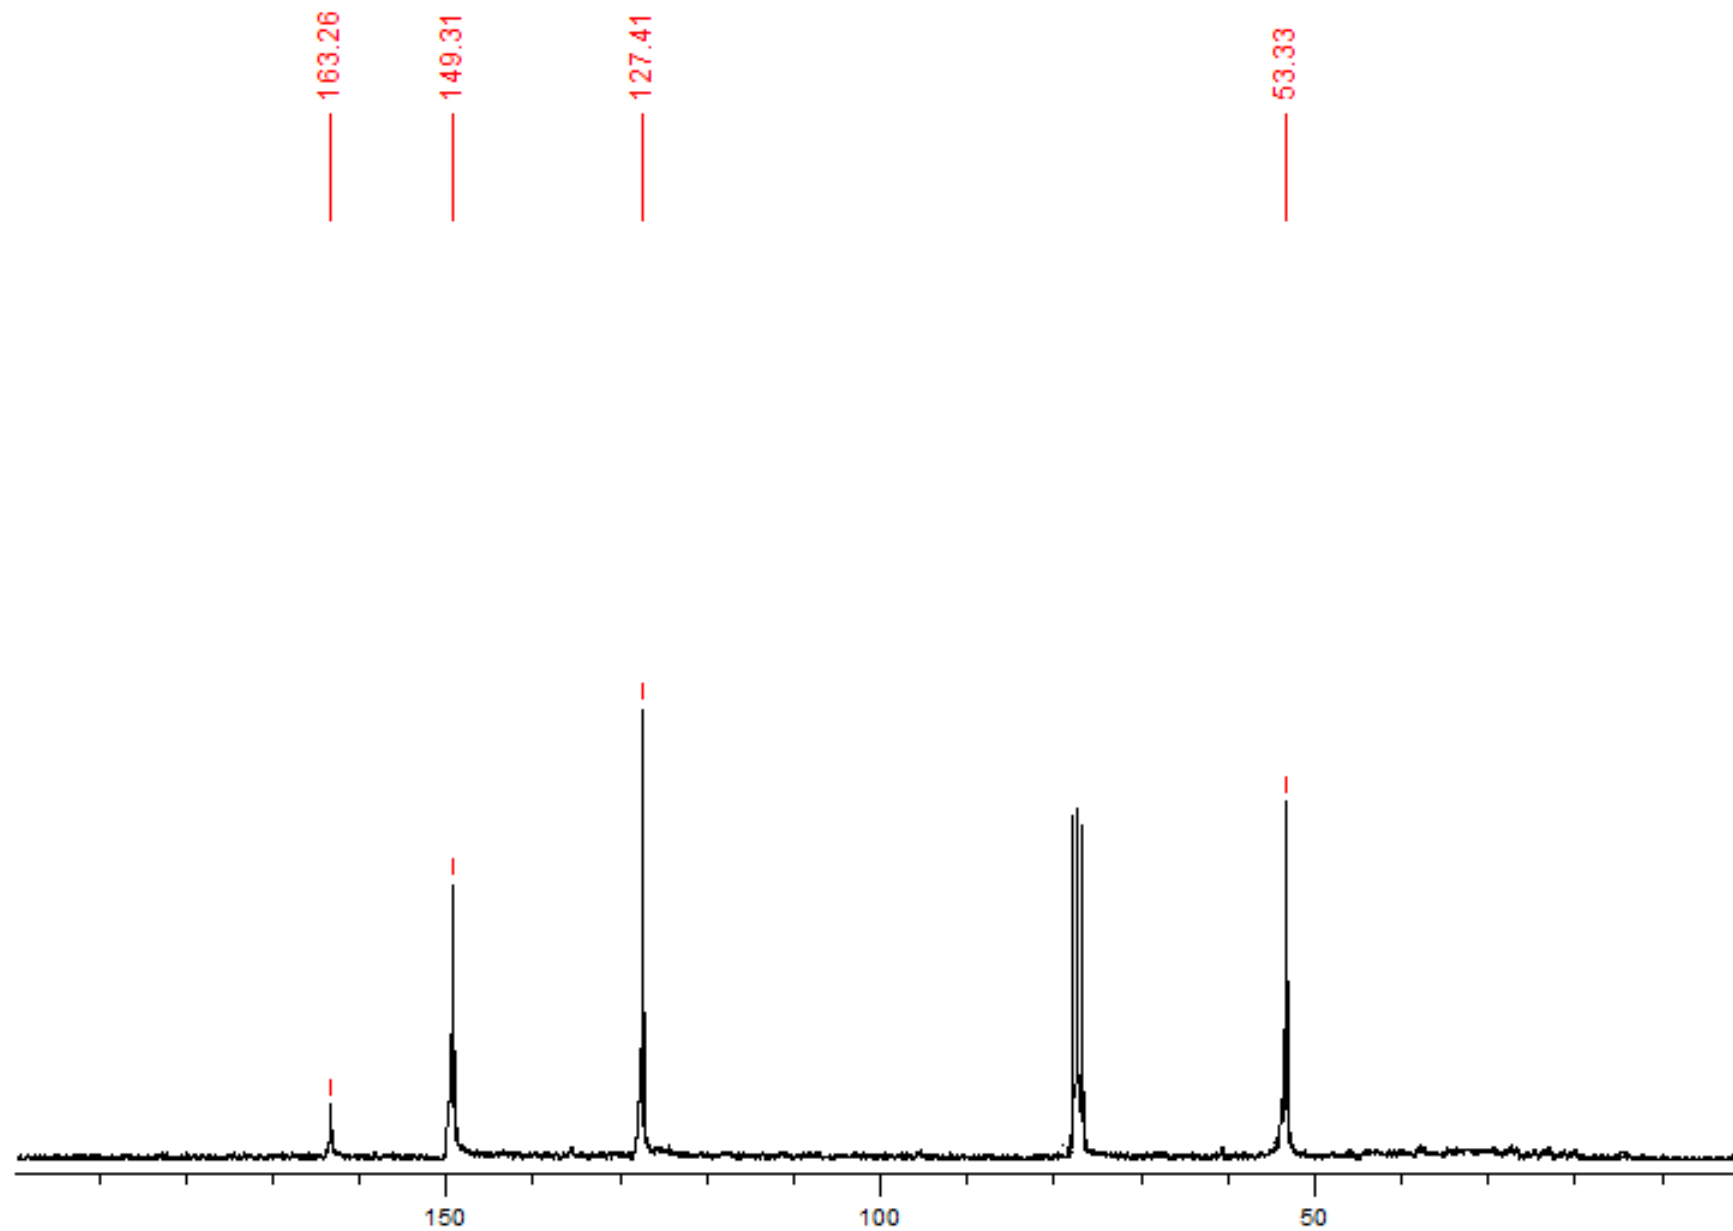

$^1\text{H}$  NMR **4m**

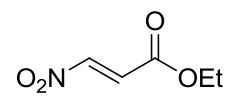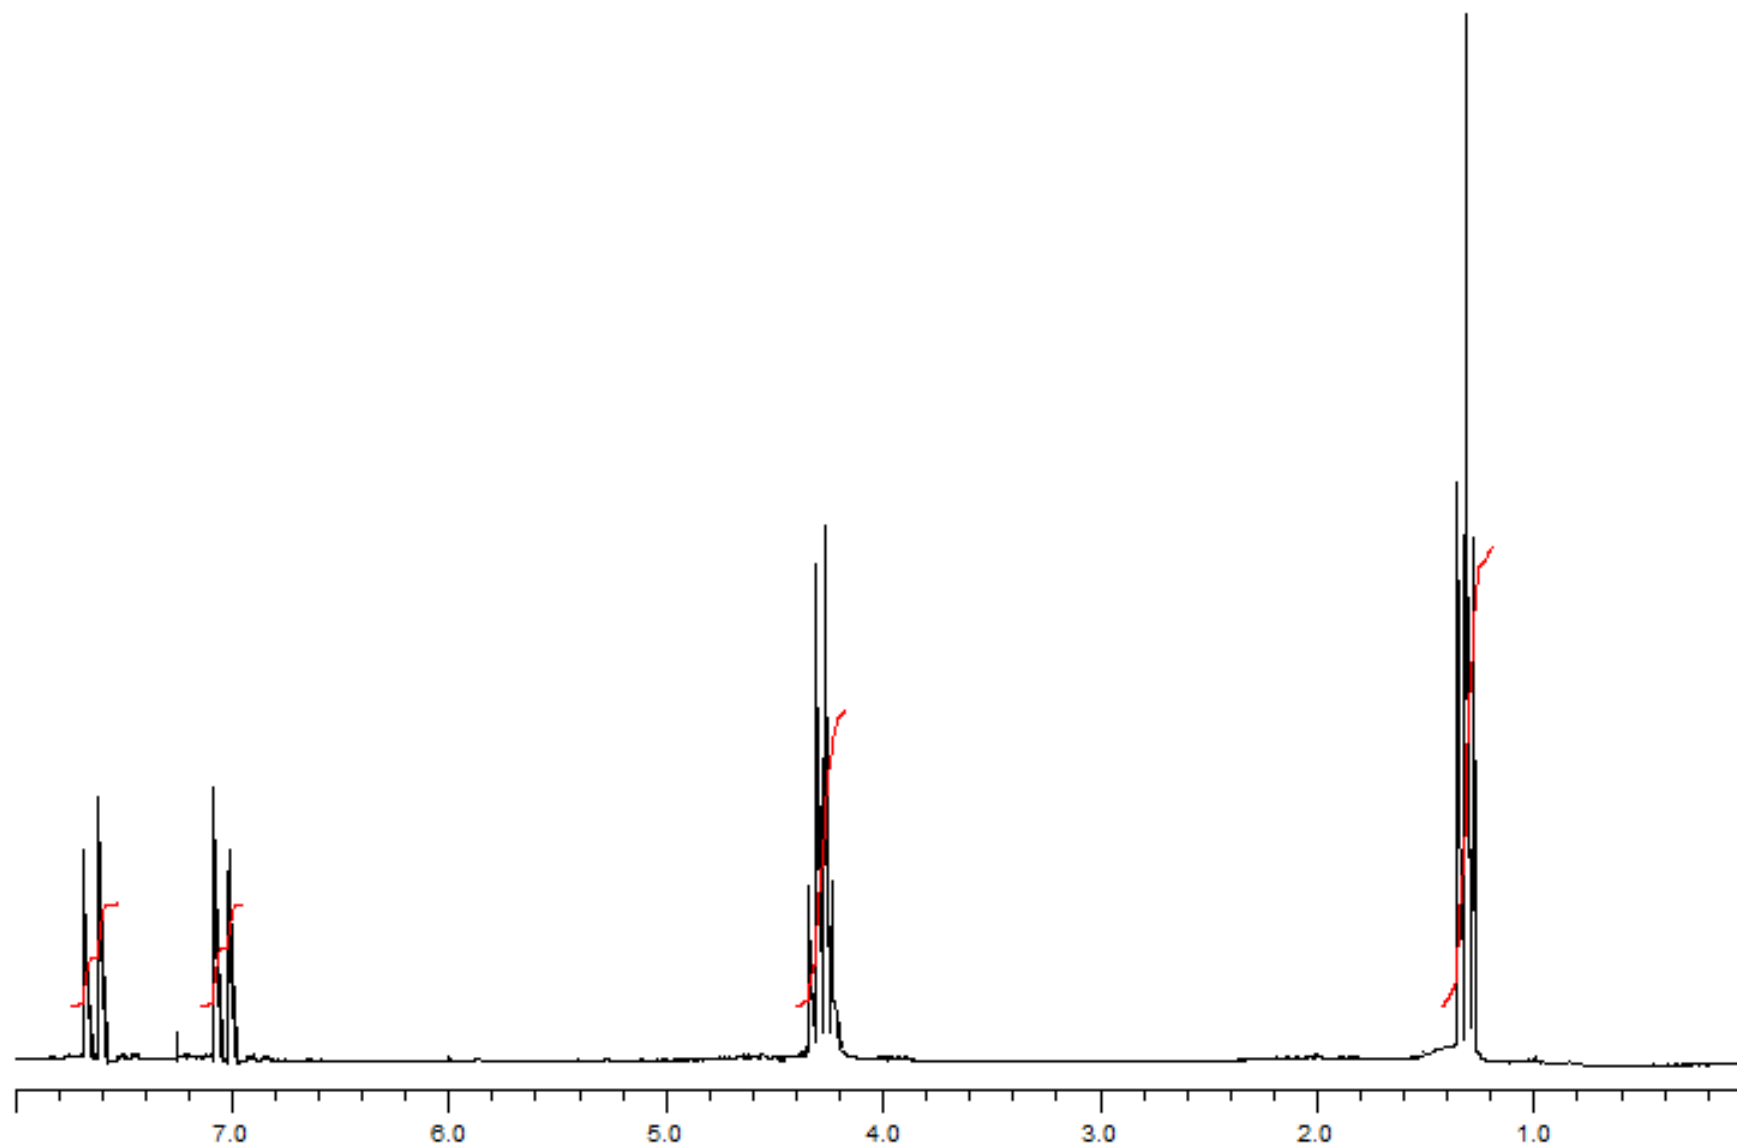

$^{13}\text{C}$  NMR 4m

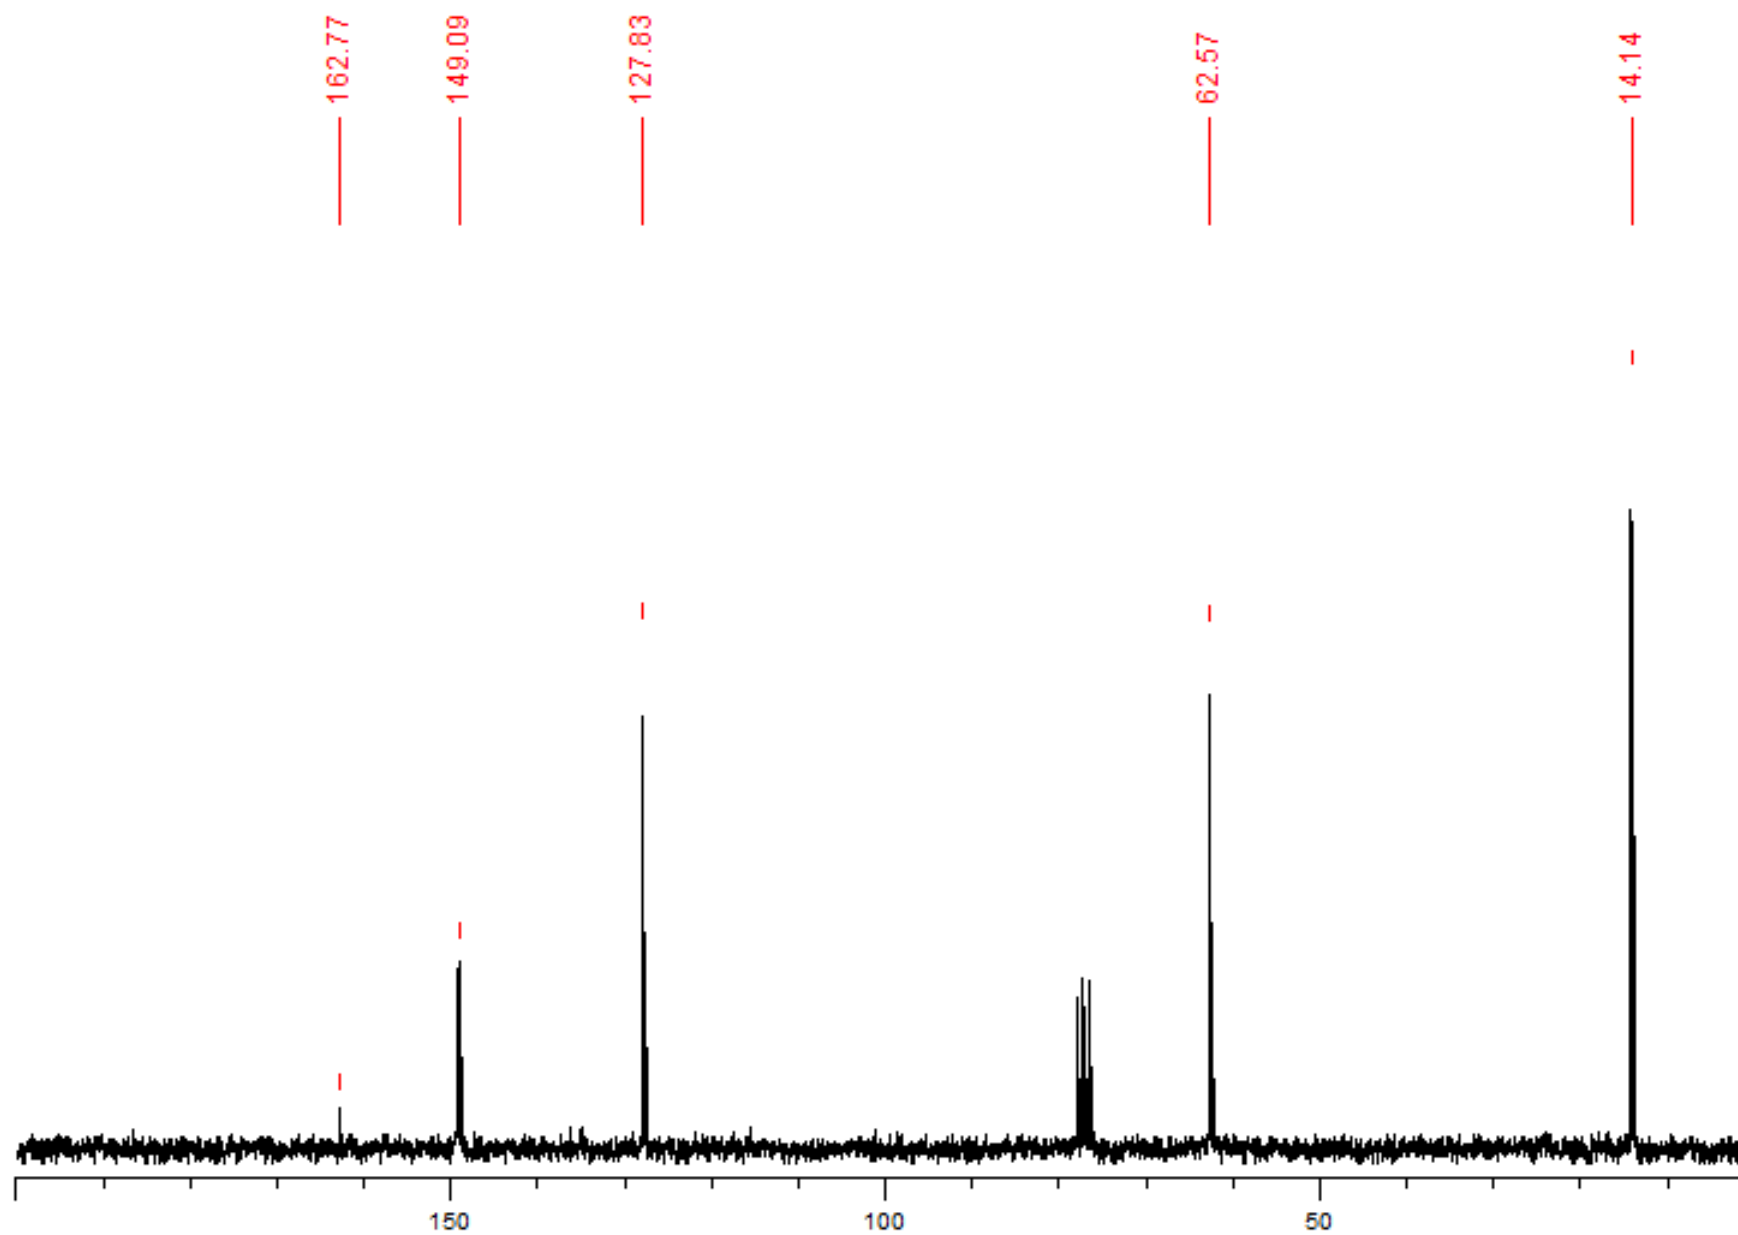

$^1\text{H}$  NMR **4n**

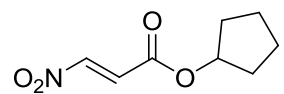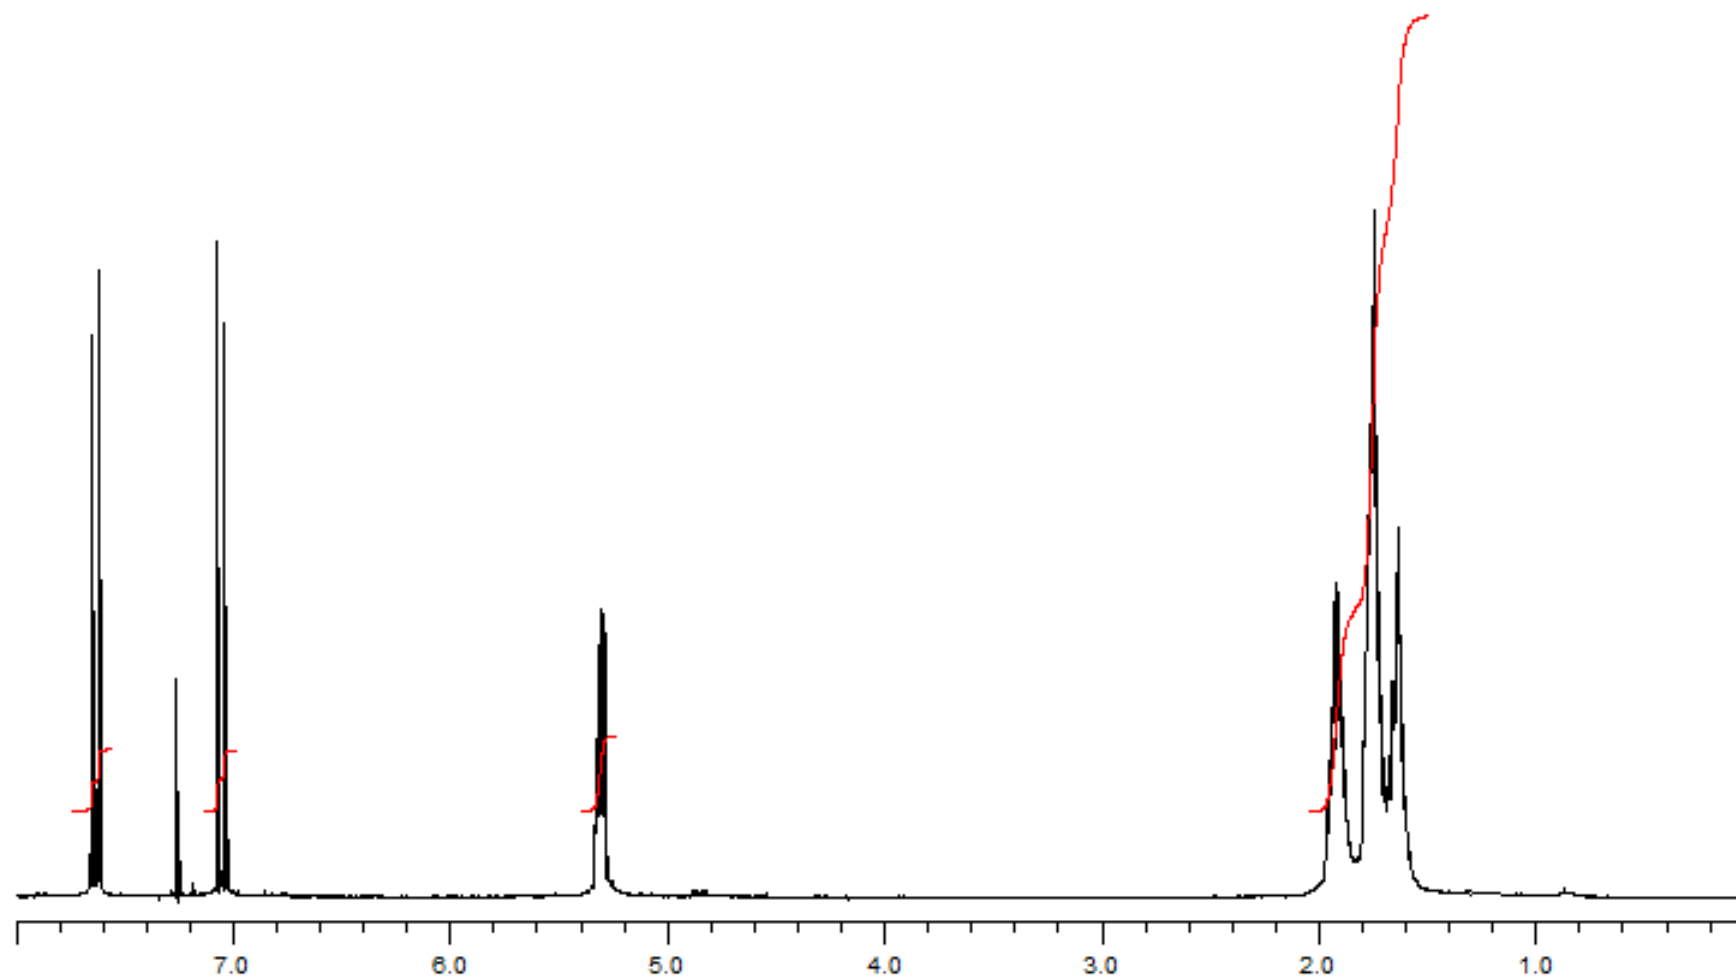

$^{13}\text{C}$  NMR **4n**

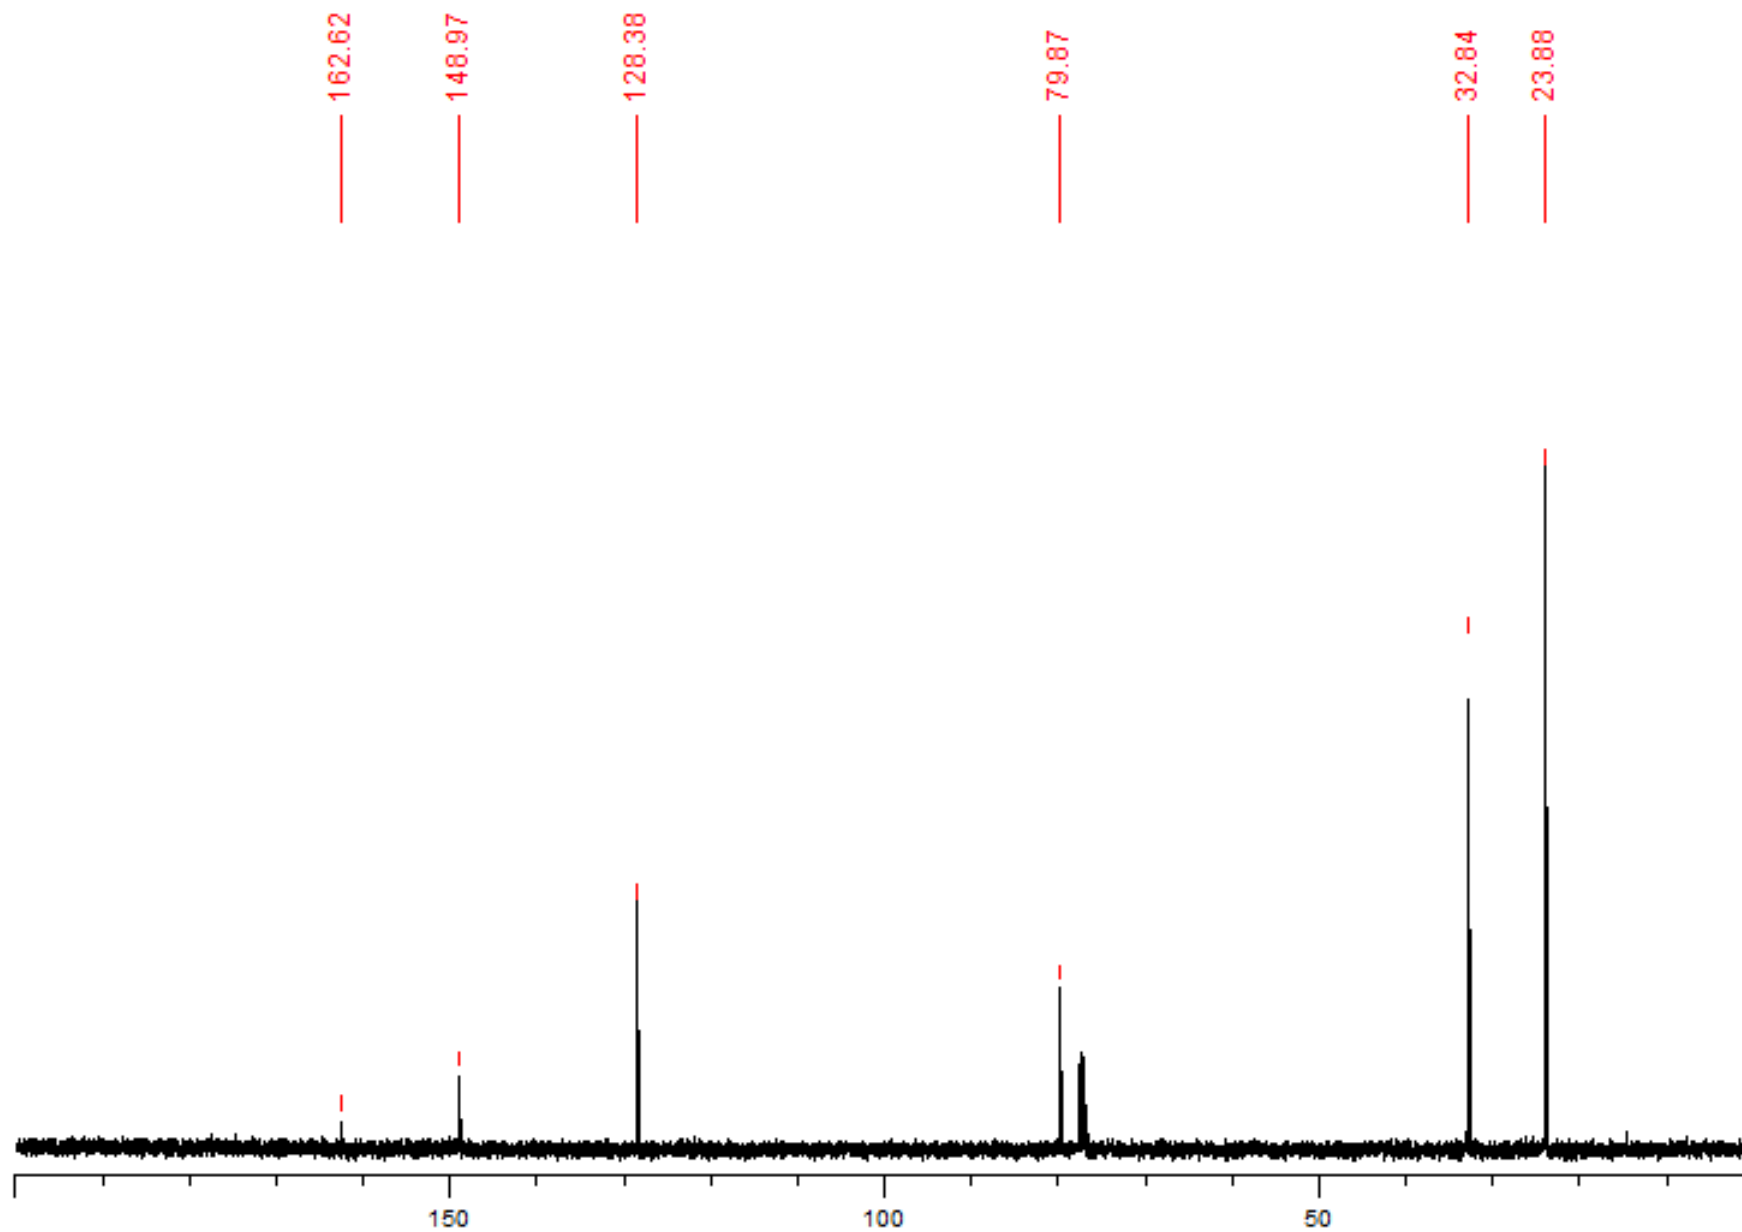

Supplement: c3gc40936h_2.pdf [file c3gc40936h_2.pdf]
